# Supplementary material for: Six New Phenolic Glycosides from the Seeds of Moringa oleifera Lam. and Their α-Glucosidase Inhibitory Activity
Source: MDPI journal article supplement (doi:10.3390/molecules28176426), 2023-09-04
Supplement: s1 [file s1]

# Six New Phenolic Glycosides from the Seeds of *Moringa oleifera* Lam. and Their $\alpha$ -glucosidase Inhibitory Activity

Lin-Zhen Li <sup>1,2,3,†</sup>, Liang Chen <sup>1,4,†</sup>, Yang-Li Tu <sup>1,4</sup>, Xiang-Jie Dai <sup>1,4</sup>,  
Sheng-Jia Xiao <sup>1,4</sup>, Jing-Shan Shi <sup>2,\*</sup>, Yong-Jun Li <sup>4,\*</sup> and  
Xiao-Sheng Yang <sup>3</sup>

<sup>1</sup> School of Pharmacy, Guizhou Medical University, Guiyang 550004, China;  
lilinzhen@gmc.edu.cn (L.-Z.L.); 13624538210@139.com (L.C.); tyltyl715@163.com  
(Y.-L.T.); daixiangjie2023@163.com (X.-J.D.); xshengjia213@163.com (S.-J.X.)

<sup>2</sup> Key Laboratory of Basic Pharmacology of Ministry of Education, Zunyi Medical  
University, Zunyi 563000, China

<sup>3</sup> State Key Laboratory of Functions and Applications of Medicinal Plants, Guizhou  
Medical University, Guiyang 550004, China; yang\_xiaosheng@yahoo.com

<sup>4</sup> Engineering Research Center for the Development and Application of Ethnic  
Medicine and TCM, Ministry of Education, Guizhou Medical University, Guiyang  
550004, China

\* Correspondence: shijs@zmc.edu.cn (J.-S.S.); liyongjun026@gmc.edu.cn (Y.-J.L.)

<sup>†</sup> These authors contributed equally to this work.

## **Contents**

**Figure S1.** HR-ESI-MS spectrum of compound **1** (positive mode).

**Figure S2.** UV spectrum of compound **1**.

**Figure S3.** IR spectrum of compound **1**.

**Figure S4.**  $^1\text{H}$ -NMR (400MHz,  $\text{CD}_3\text{OD}$ ) spectrum of compound **1**.

**Figure S5.**  $^{13}\text{C}$  -NMR (100MHz,  $\text{CD}_3\text{OD}$ ) spectrum of compound **1**.

**Figure S6.** HMQC spectrum of compound **1**.

**Figure S7.** HMBC spectrum of compound **1**.

**Figure S8.**  $^1\text{H}$ - $^1\text{H}$  COSY spectrum of compound **1**.

**Figure S9.** HR-ESI-MS spectrum of compound **2** (positive mode).

**Figure S10.** UV spectrum of compound **2**.

**Figure S11.** IR spectrum of compound **2**.

**Figure S12.**  $^1\text{H}$ -NMR (600MHz,  $\text{CD}_3\text{OD}$ ) spectrum of compound **2**.

**Figure S13.**  $^{13}\text{C}$ -NMR (150MHz,  $\text{CD}_3\text{OD}$ ) spectrum of compound **2**.

**Figure S14.** HMQC spectrum of compound **2**.

**Figure S15.** HMBC spectrum of compound **2**.

**Figure S16.**  $^1\text{H}$ - $^1\text{H}$  COSY spectrum of compound **2**.

**Figure S17.** NOESY spectrum of compound **2**.

**Figure S18.** HR-ESI-MS spectrum of compound **3** (positive mode).

**Figure S19.** UV spectrum of compound **3**.

**Figure S20.** IR spectrum of compound **3**.

**Figure S21.**  $^1\text{H}$ -NMR (600MHz,  $\text{CD}_3\text{OD}$ ) spectrum of compound **3**.

**Figure S22.**  $^{13}\text{C}$ -NMR (150MHz,  $\text{CD}_3\text{OD}$ ) spectrum of compound **3**.

**Figure S23.** HMQC spectrum of compound **3**.

**Figure S24.** HMBC spectrum of compound **3**.

**Figure S25.**  $^1\text{H}$ - $^1\text{H}$  COSY spectrum of compound **3**.

**Figure S26.** NOESY spectrum of compound **3**.

**Figure S27.** HR-ESI-MS spectrum of compound **4** (positive mode).

**Figure S28.** UV spectrum of compound **4**.

**Figure S29.** IR spectrum of compound **4**.

**Figure S30.**  $^1\text{H}$ -NMR (600MHz,  $\text{CD}_3\text{OD}$ ) spectrum of compound **4**.

**Figure S31.**  $^{13}\text{C}$ -NMR (150MHz,  $\text{CD}_3\text{OD}$ ) spectrum of compound **4**.

**Figure S32.** HMQC spectrum of compound **4**.

**Figure S33.** HMBC spectrum of compound **4**.

**Figure S34.**  $^1\text{H}$ - $^1\text{H}$  COSY spectrum of compound **4**.

**Figure S35.** HR-ESI-MS spectrum of compound **5** (negative mode).

**Figure S36.** UV spectrum of compound **5**.

**Figure S37.** IR spectrum of compound **5**.

**Figure S38.**  $^1\text{H}$ -NMR (600MHz,  $\text{CD}_3\text{OD}$ ) spectrum of compound **5**.

**Figure S39.**  $^{13}\text{C}$ -NMR (150MHz,  $\text{CD}_3\text{OD}$ ) spectrum of compound **5**.

**Figure S40.** HMQC spectrum of compound **5**.

**Figure S41.** HMBC spectrum of compound **5**.

**Figure S42.**  $^1\text{H}$ - $^1\text{H}$  COSY spectrum of compound **5**.

**Figure S43.** HR-ESI-MS spectrum of compound **6** (positive mode).

**Figure S44.** UV spectrum of compound **6**.

**Figure S45.** IR spectrum of compound **6**.

**Figure S46.**  $^1\text{H}$ -NMR (600MHz,  $\text{CD}_3\text{OD}$ ) spectrum of compound **6**.

**Figure S47.**  $^{13}\text{C}$ -NMR (150MHz,  $\text{CD}_3\text{OD}$ ) spectrum of compound **6**.

**Figure S48.** HMQC spectrum of compound **6**.

**Figure S49.** HMBC spectrum of compound **6**.

**Figure S50.**  $^1\text{H}$ - $^1\text{H}$  COSY spectrum of compound **6**.

**Figure S51.** GC analysis of D-rhamnose, L-rhamnose and compounds **1–6**.

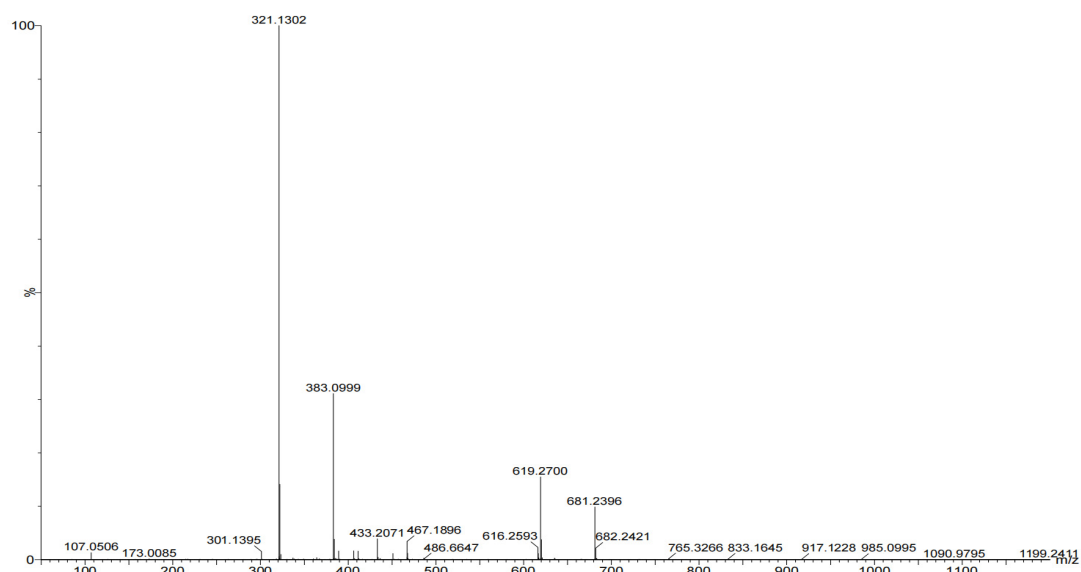

**Figure S1.** HR-ESI-MS spectrum of compound **1** (positive mode).

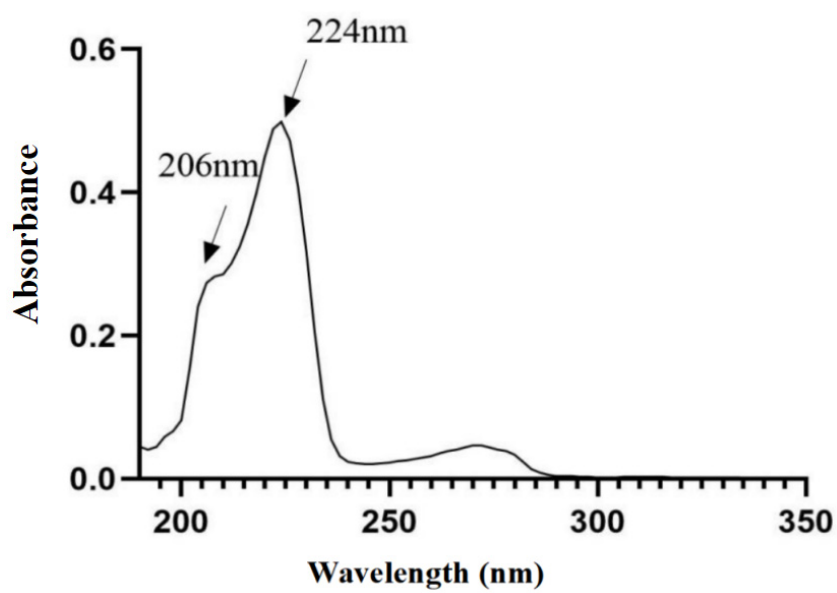

**Figure S2.** UV spectrum of compound **1**.

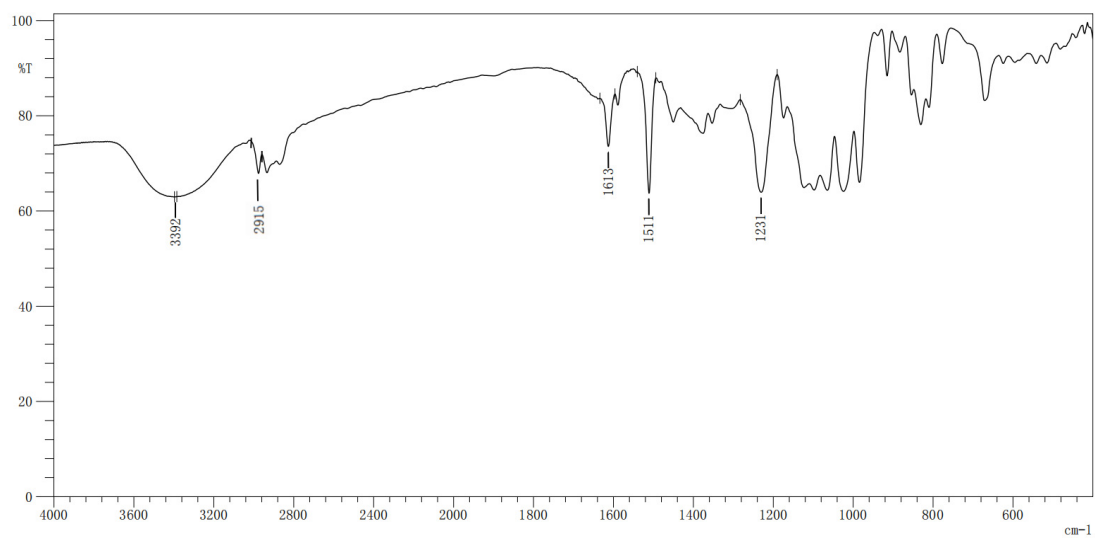

**Figure S3.** IR spectrum of compound **1**.

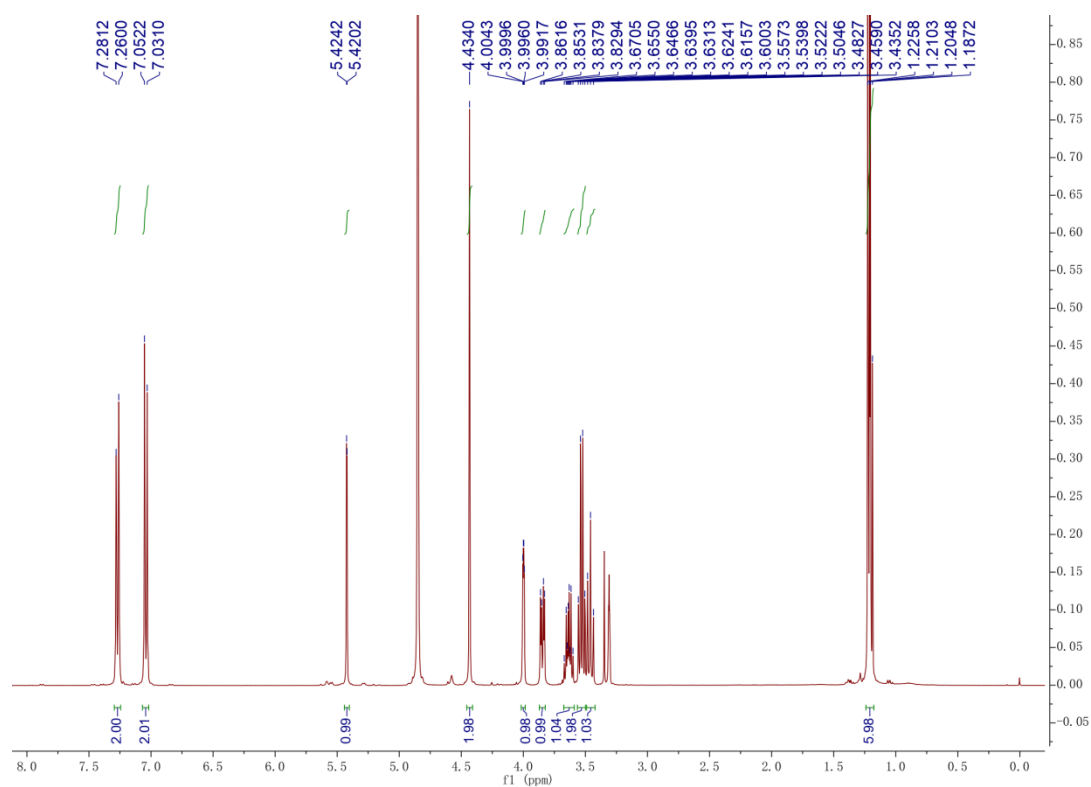

**Figure S4.** <sup>1</sup>H-NMR (400MHz, CD<sub>3</sub>OD) spectrum of compound **1**.

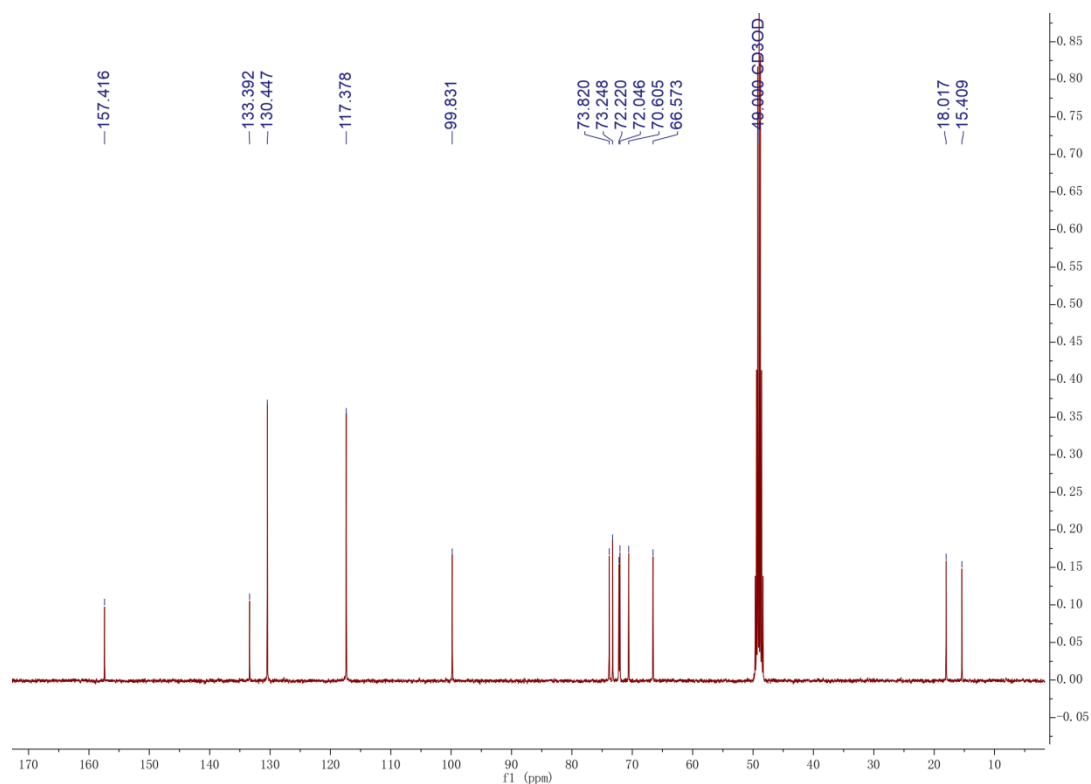

**Figure S5.**  $^{13}\text{C}$ -NMR (100MHz,  $\text{CD}_3\text{OD}$ ) spectrum of compound **1**.

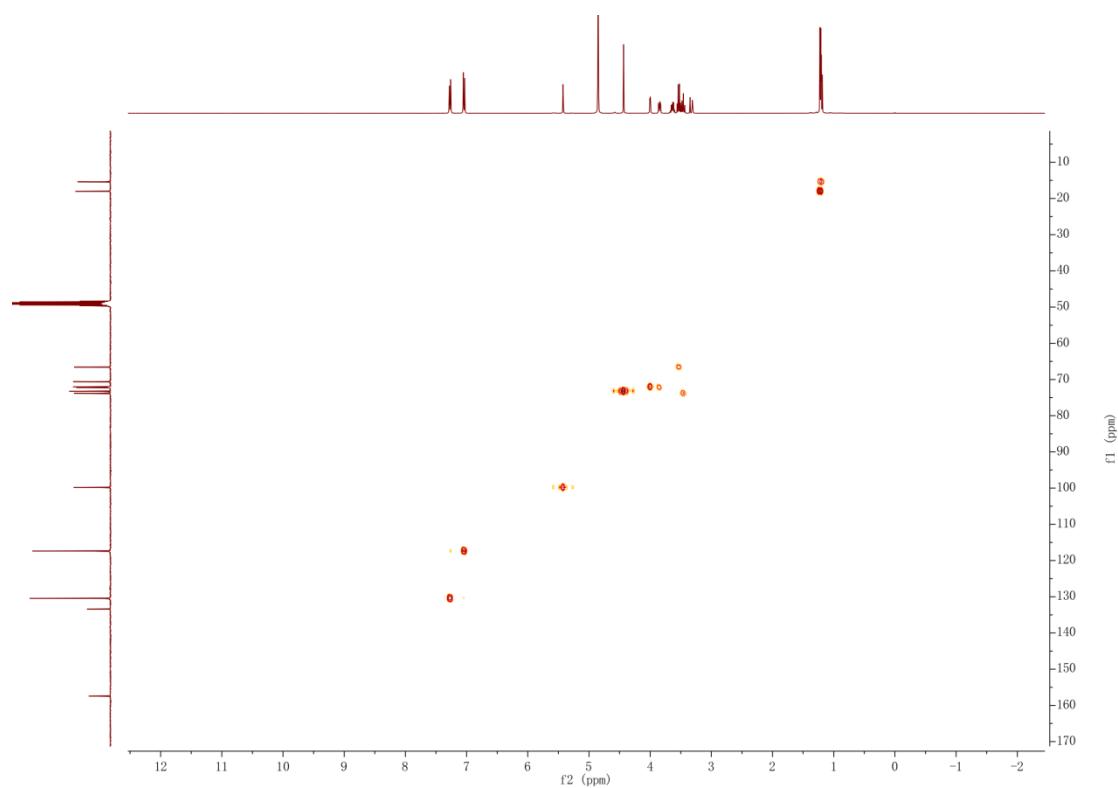

**Figure S6.** HMQC spectrum of compound **1**.

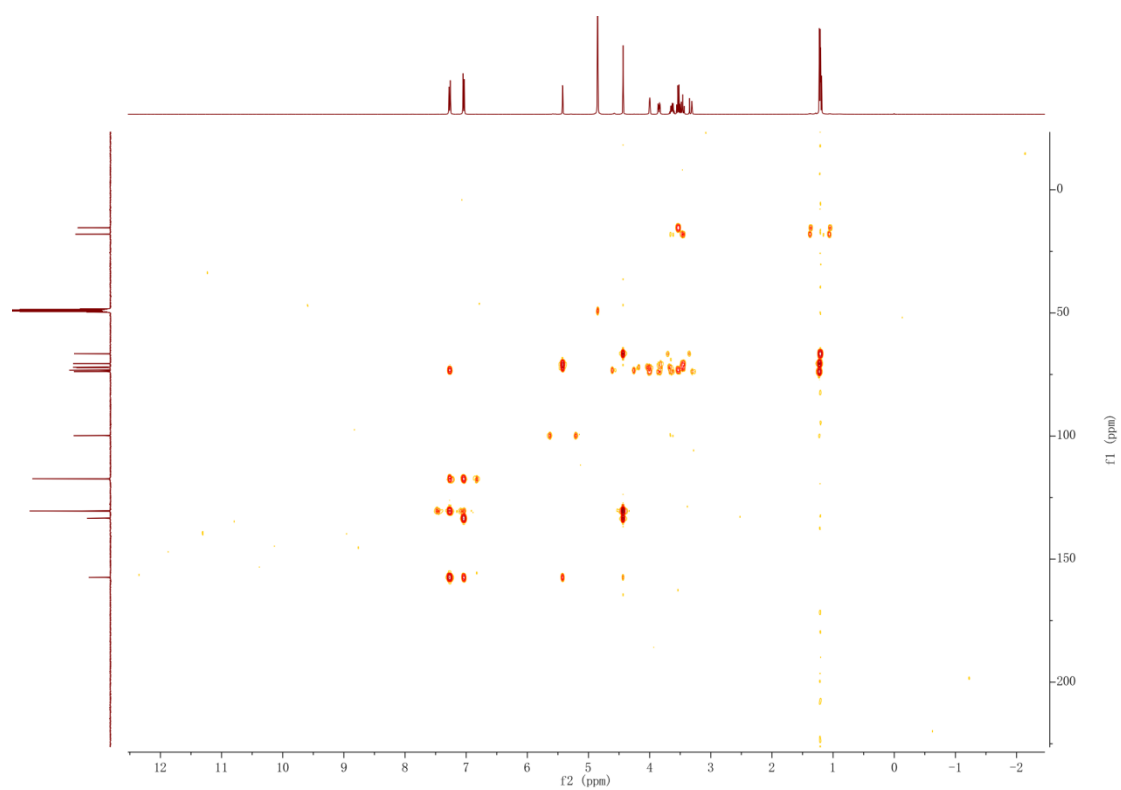

**Figure S7.** HMBC spectrum of compound **1**.

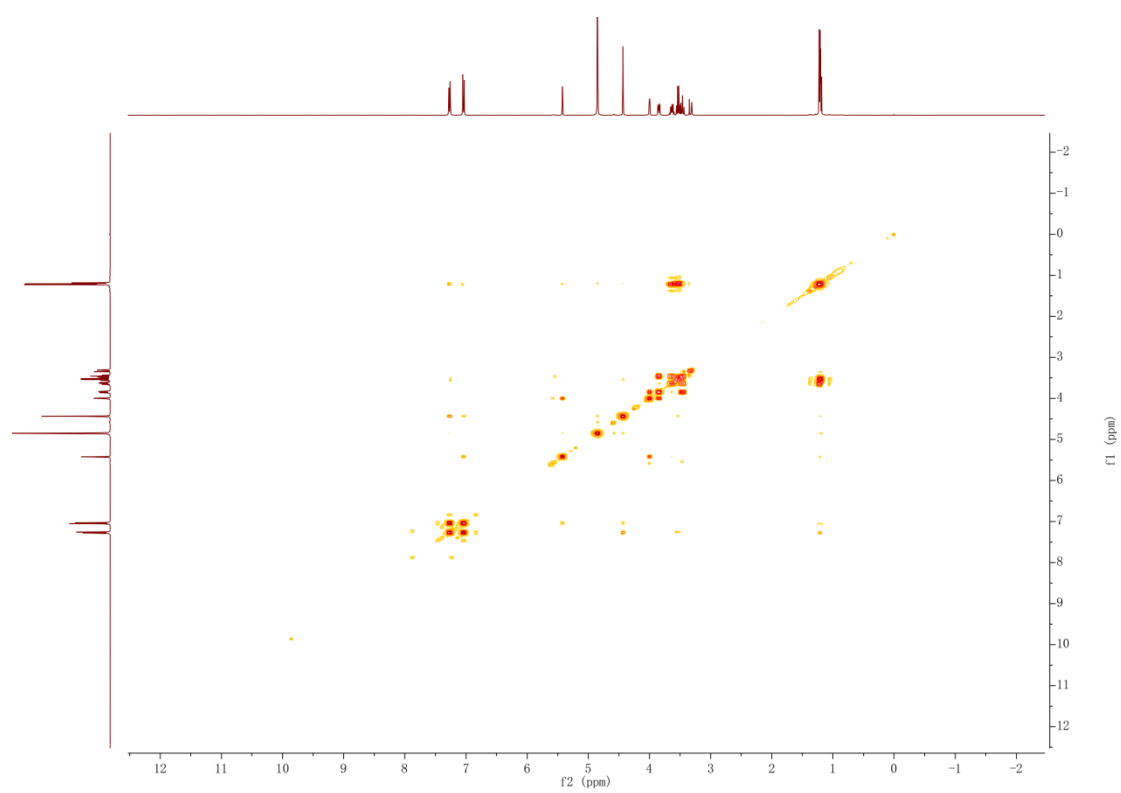

**Figure S8.**  $^1\text{H}$ - $^1\text{H}$  COSY spectrum of compound **1**.

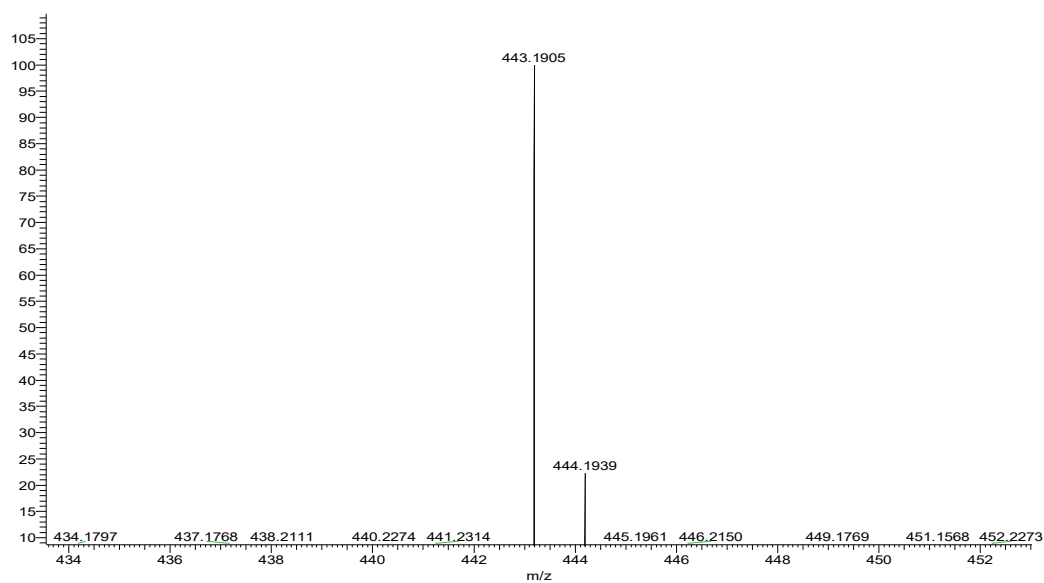

**Figure S9.** HR-ESI-MS spectrum of compound **2** (positive mode).

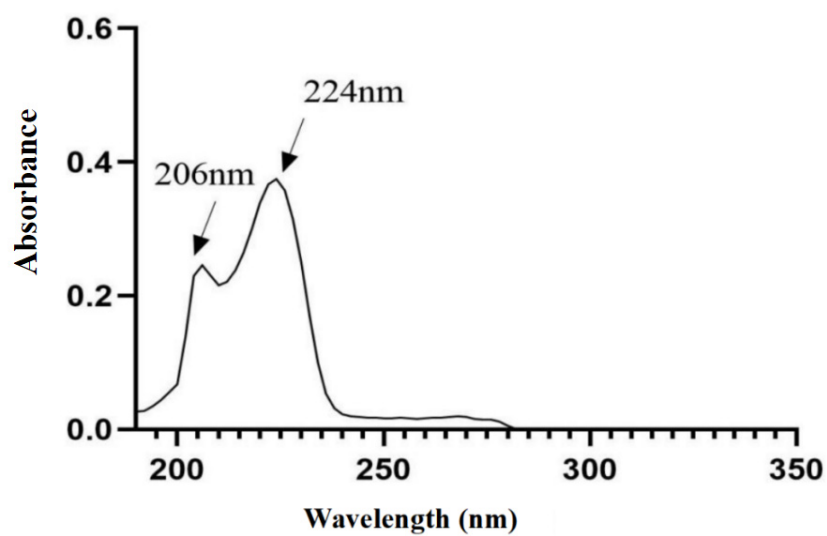

**Figure S10.** UV spectrum of compound **2**.



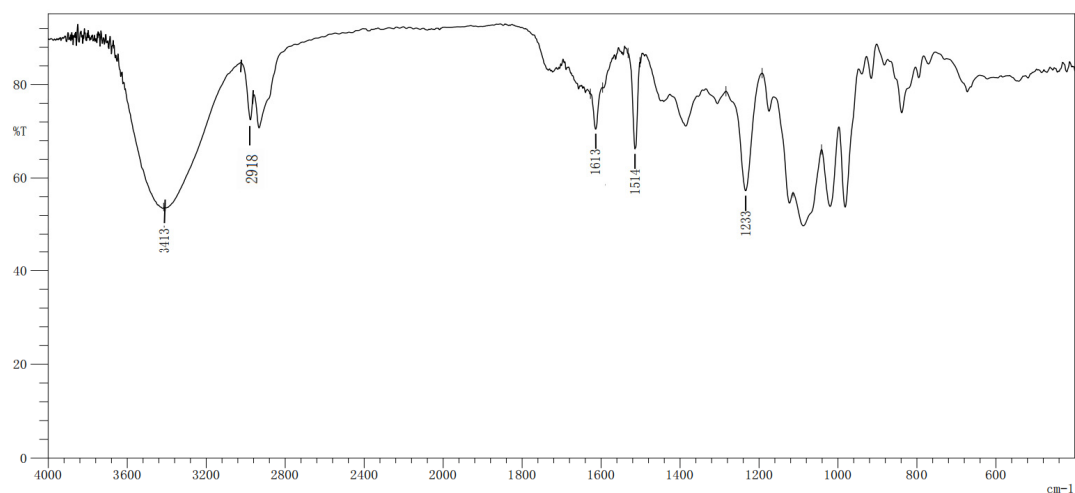

**Figure S11.** IR spectrum of compound **2**.

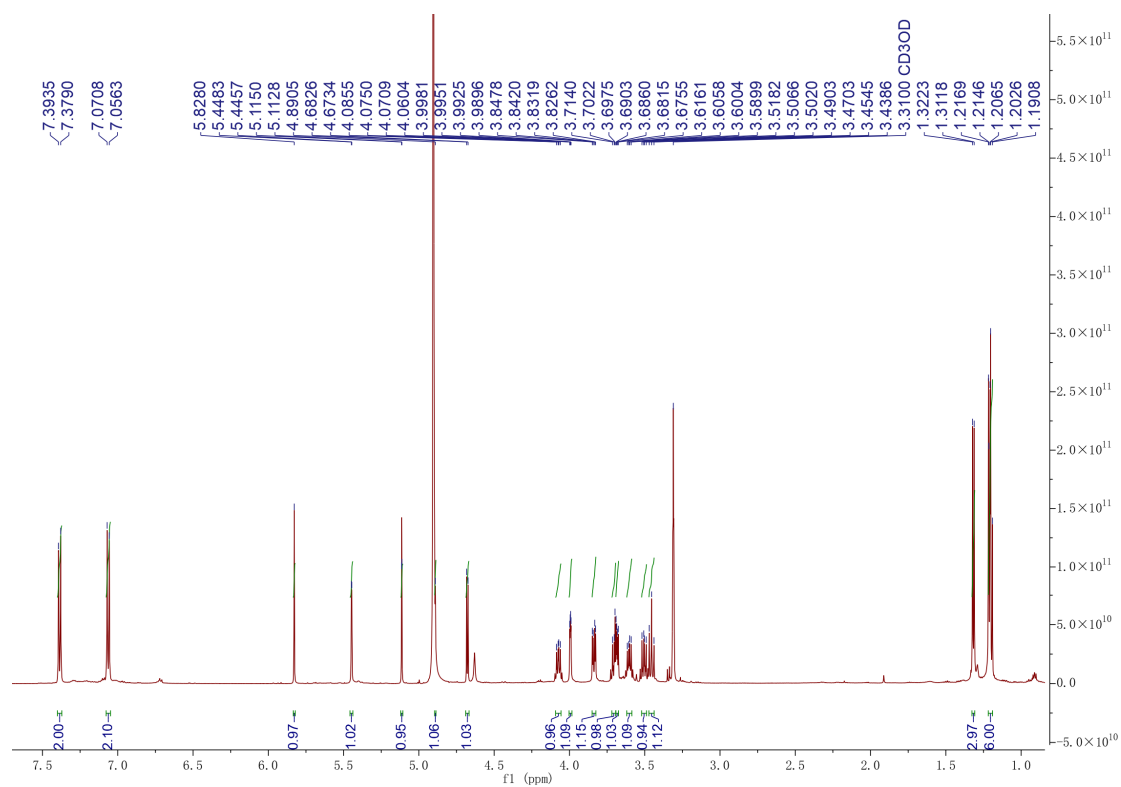

**Figure S12.** <sup>1</sup>H-NMR (600MHz, CD<sub>3</sub>OD) spectrum of compound **2**.

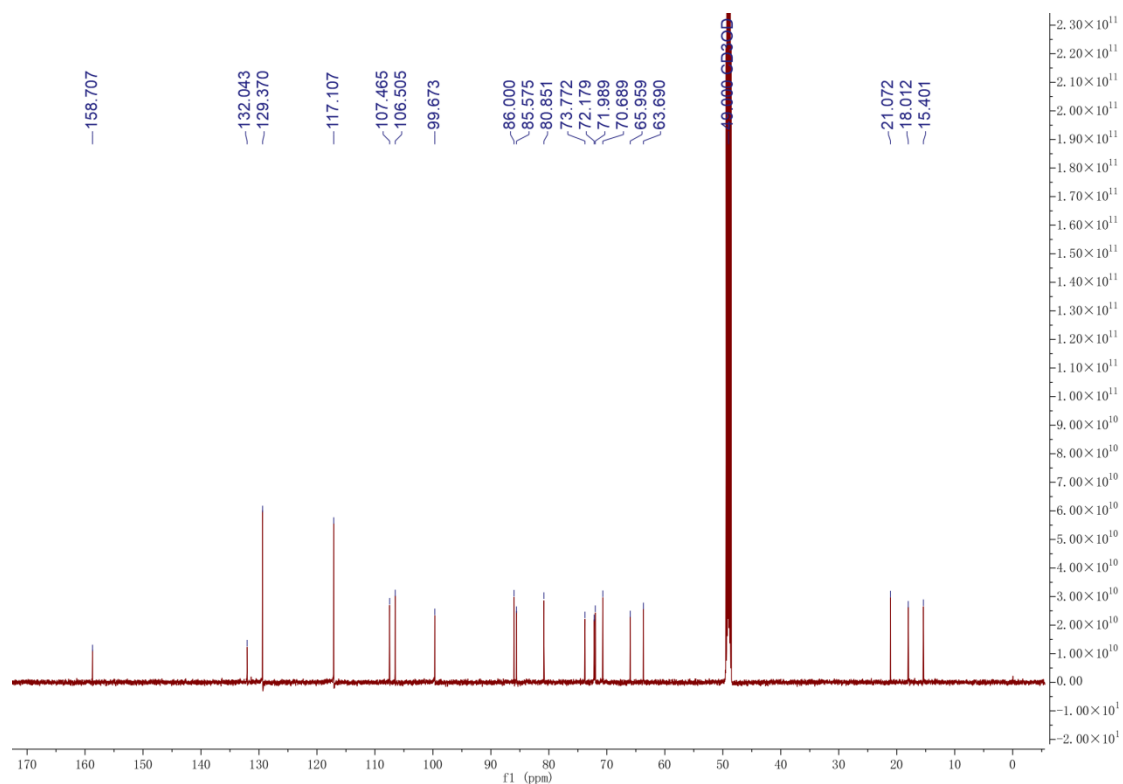

**Figure S13.**  $^{13}\text{C}$ -NMR (150MHz,  $\text{CD}_3\text{OD}$ ) spectrum of compound **2**.

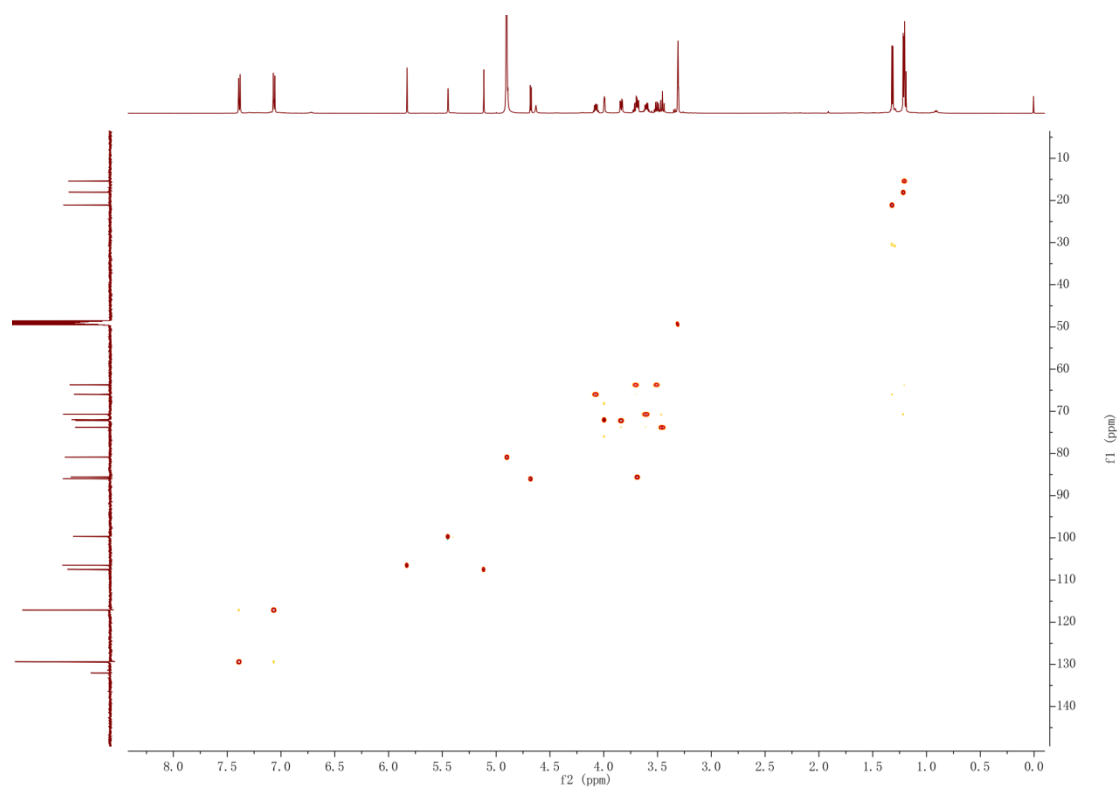

**Figure S14.** HMQC spectrum of compound **2**.

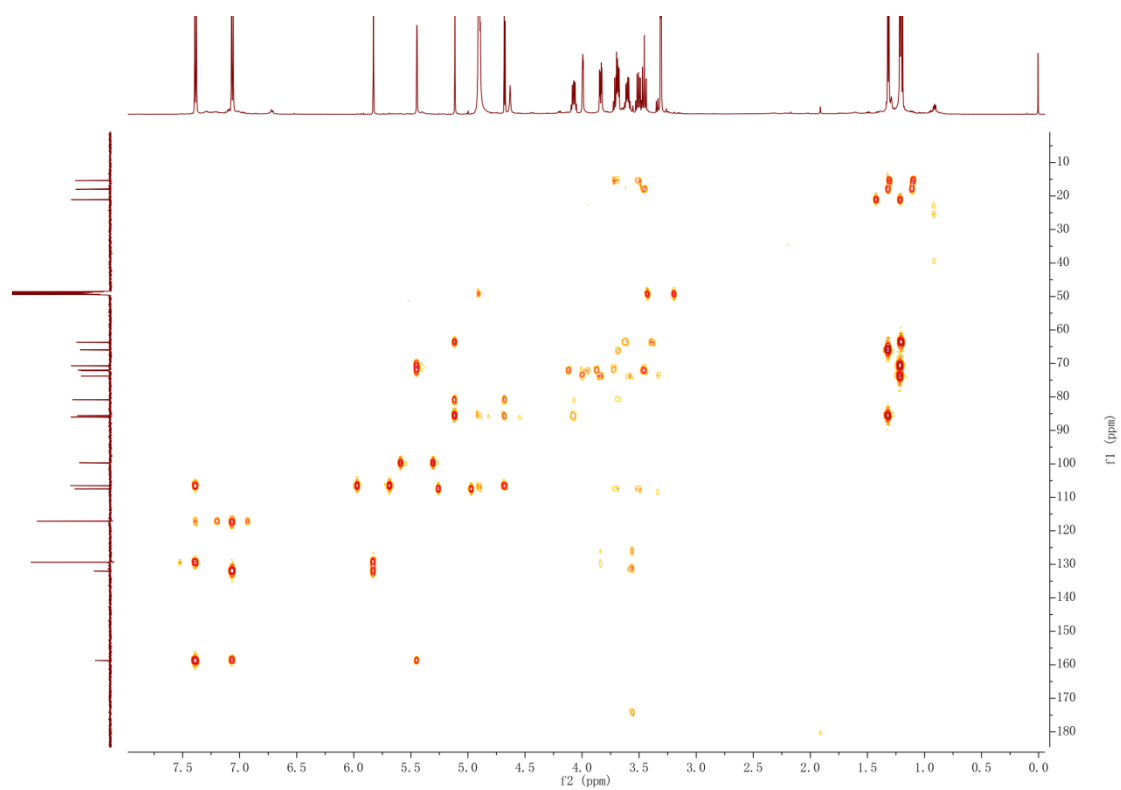

**Figure S15.** HMBC spectrum of compound **2**.

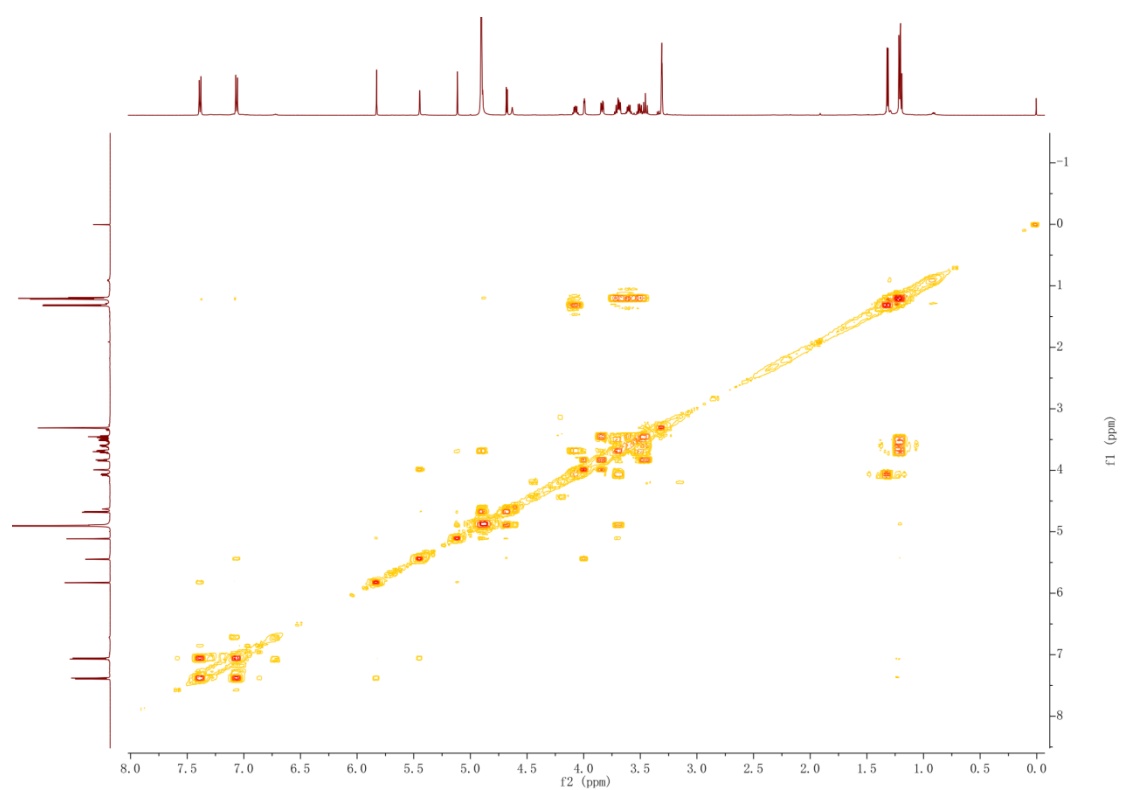

**Figure S16.**  $^1\text{H}$ - $^1\text{H}$  COSY spectrum of compound **2**.

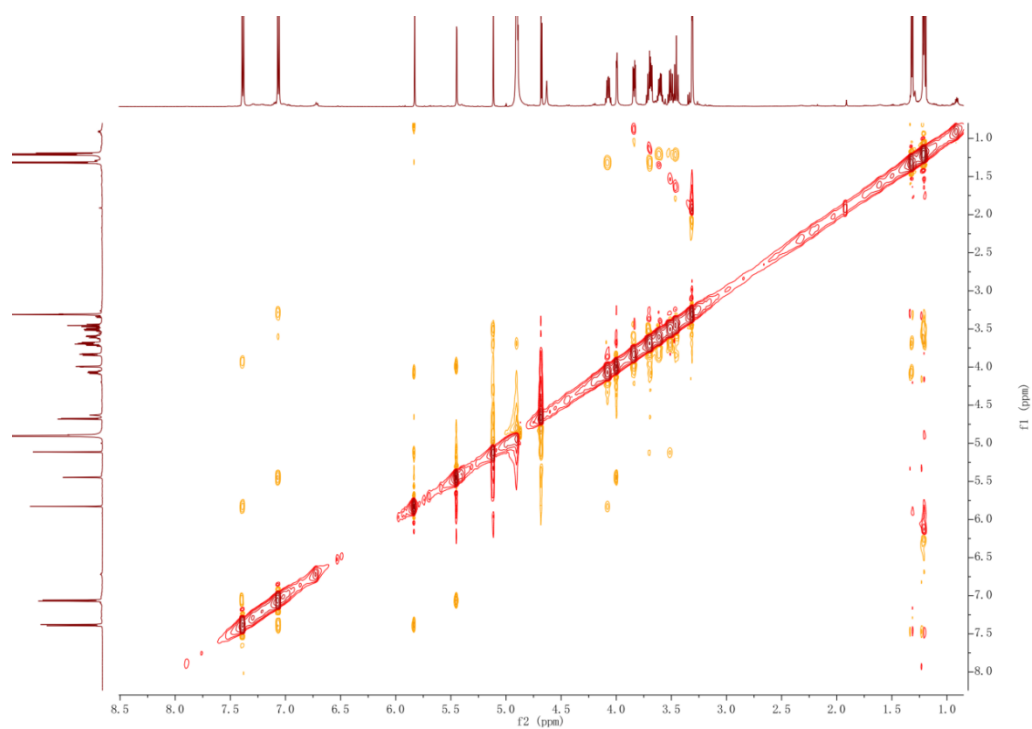

**Figure S17.** NOESY spectrum of compound **2**.

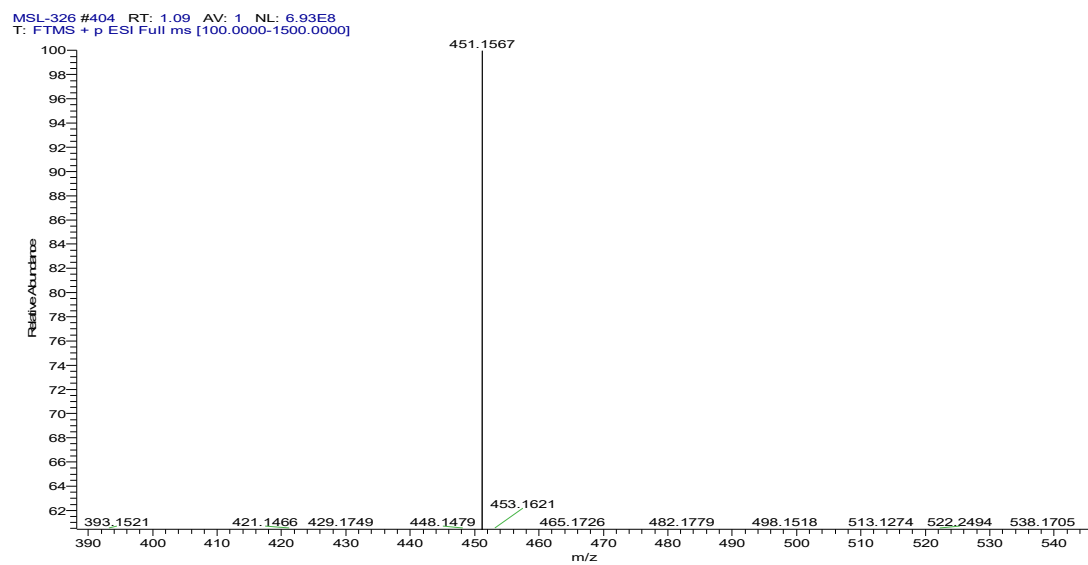

**Figure S18.** HR-ESI-MS spectrum of compound **3** (positive mode).

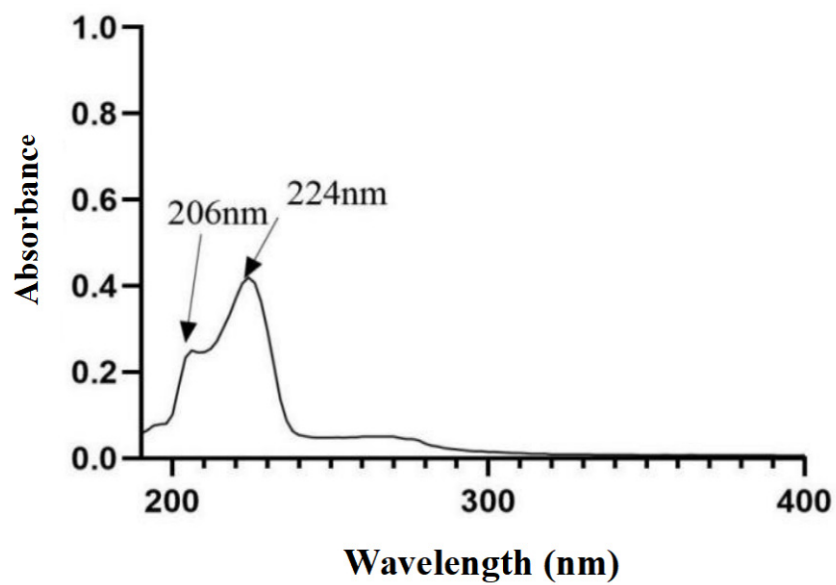

**Figure S19.** UV spectrum of compound **3**.

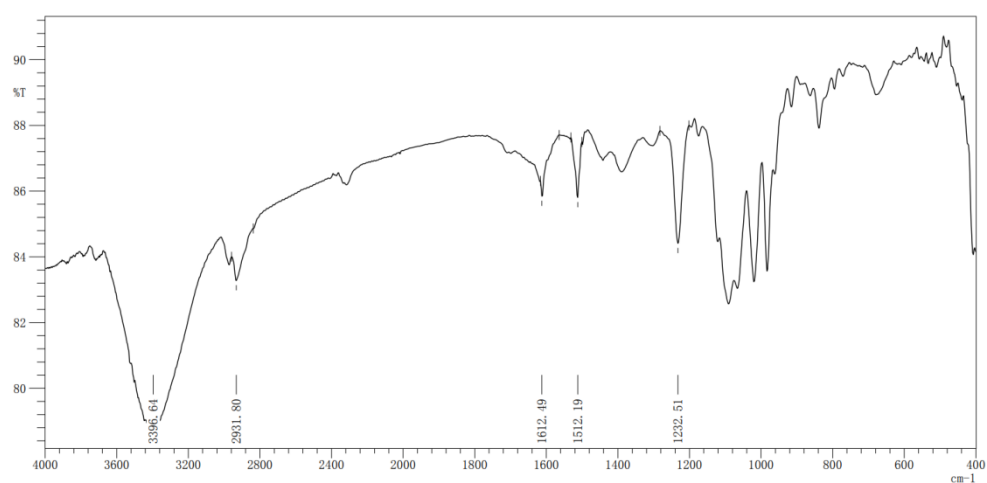

**Figure S20.** IR spectrum of compound **3**.

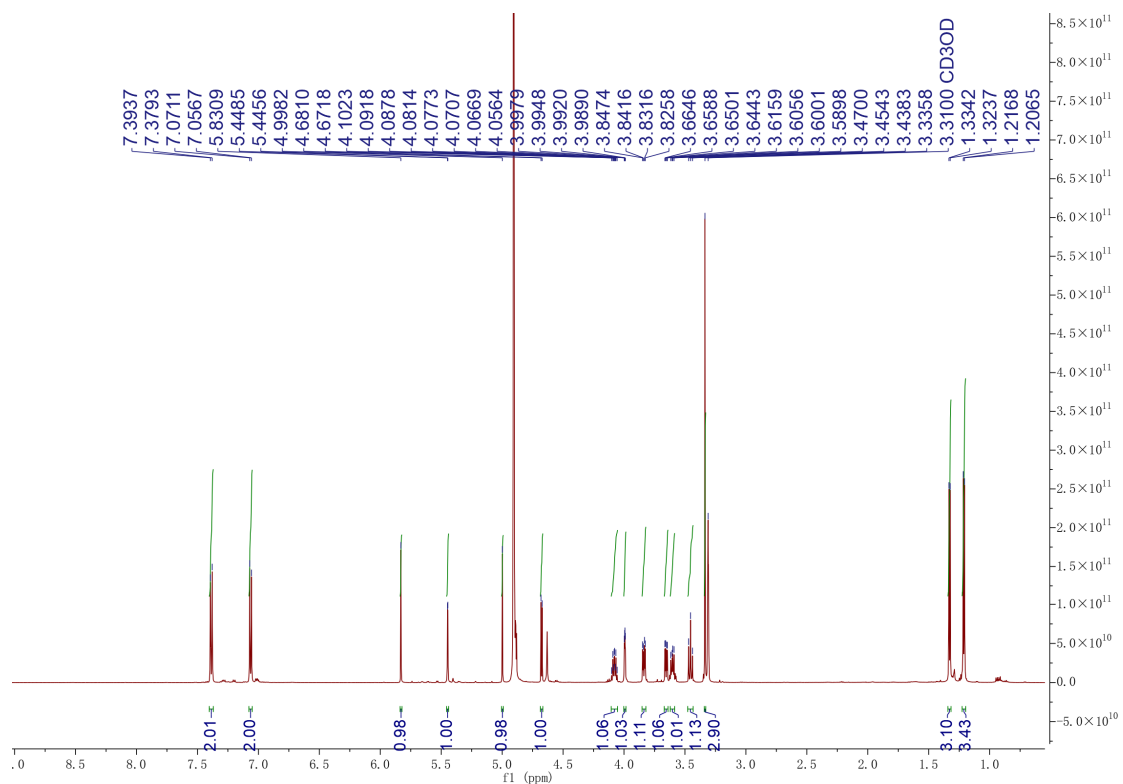

**Figure S21.** <sup>1</sup>H-NMR (600MHz, CD<sub>3</sub>OD) spectrum of compound **3**.

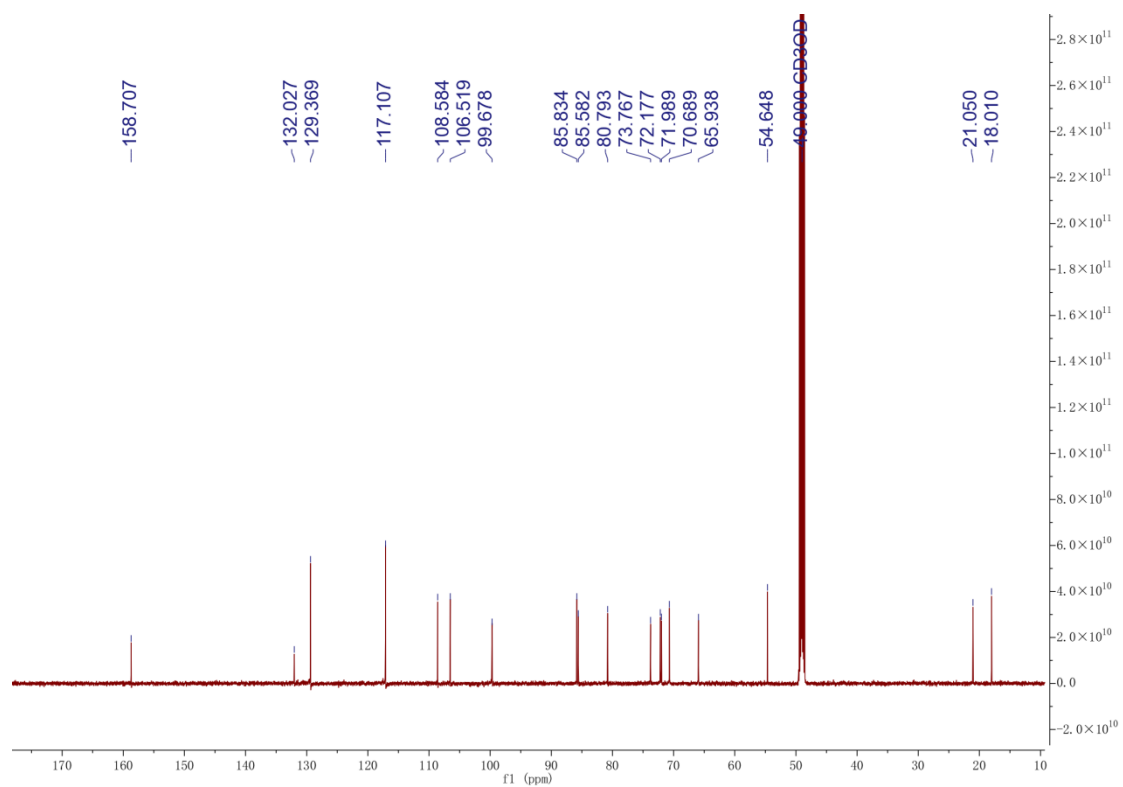

**Figure S22.** <sup>13</sup>C-NMR (150MHz, CD<sub>3</sub>OD) spectrum of compound **3**.

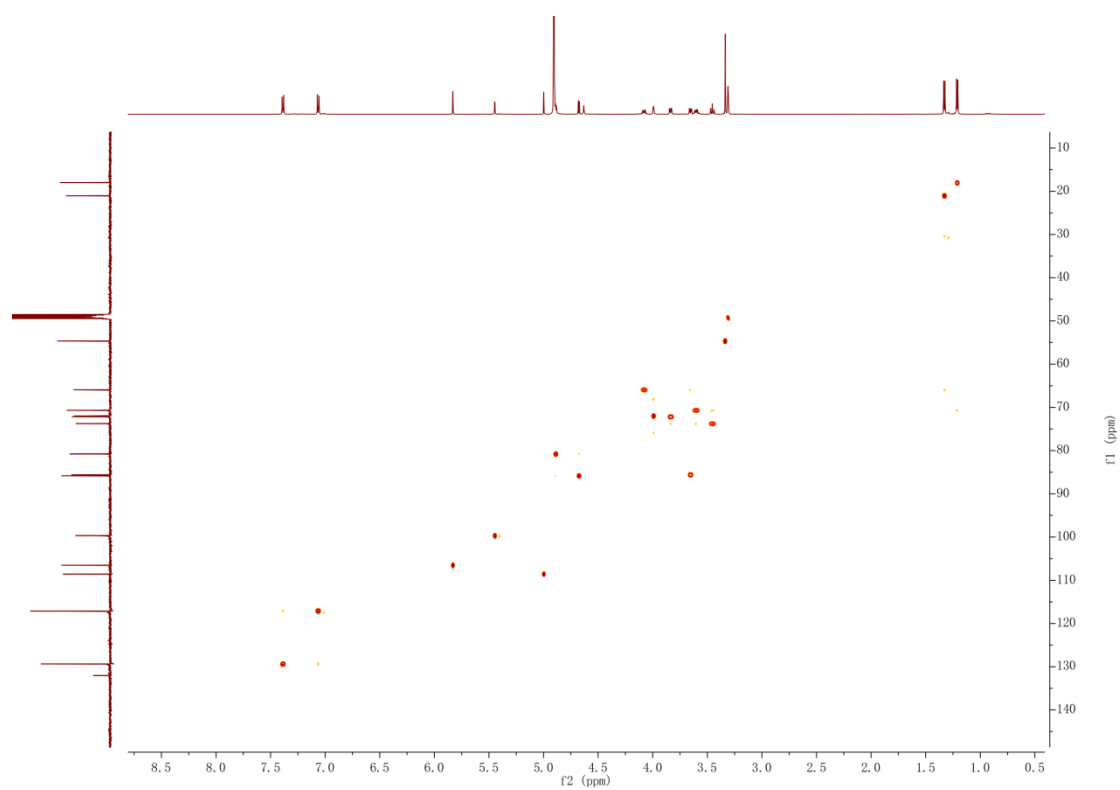

**Figure S23.** HMQC spectrum of compound **3**.

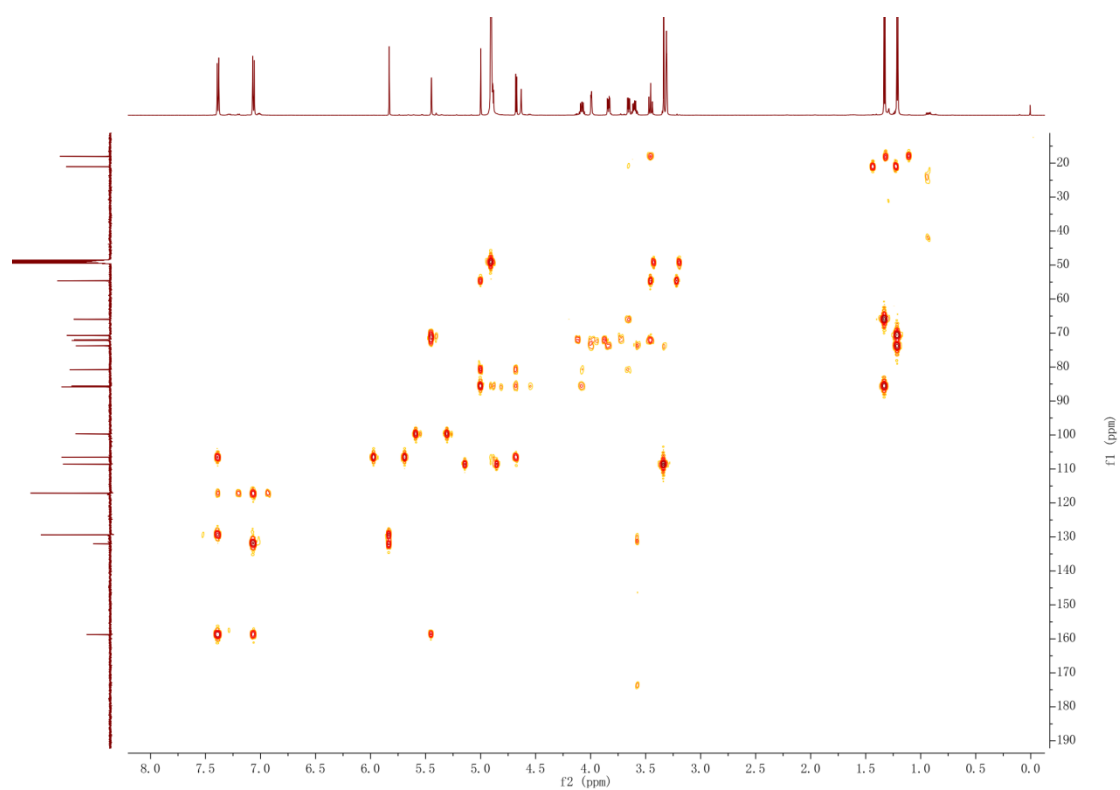

**Figure S24.** HMBC spectrum of compound **3**.

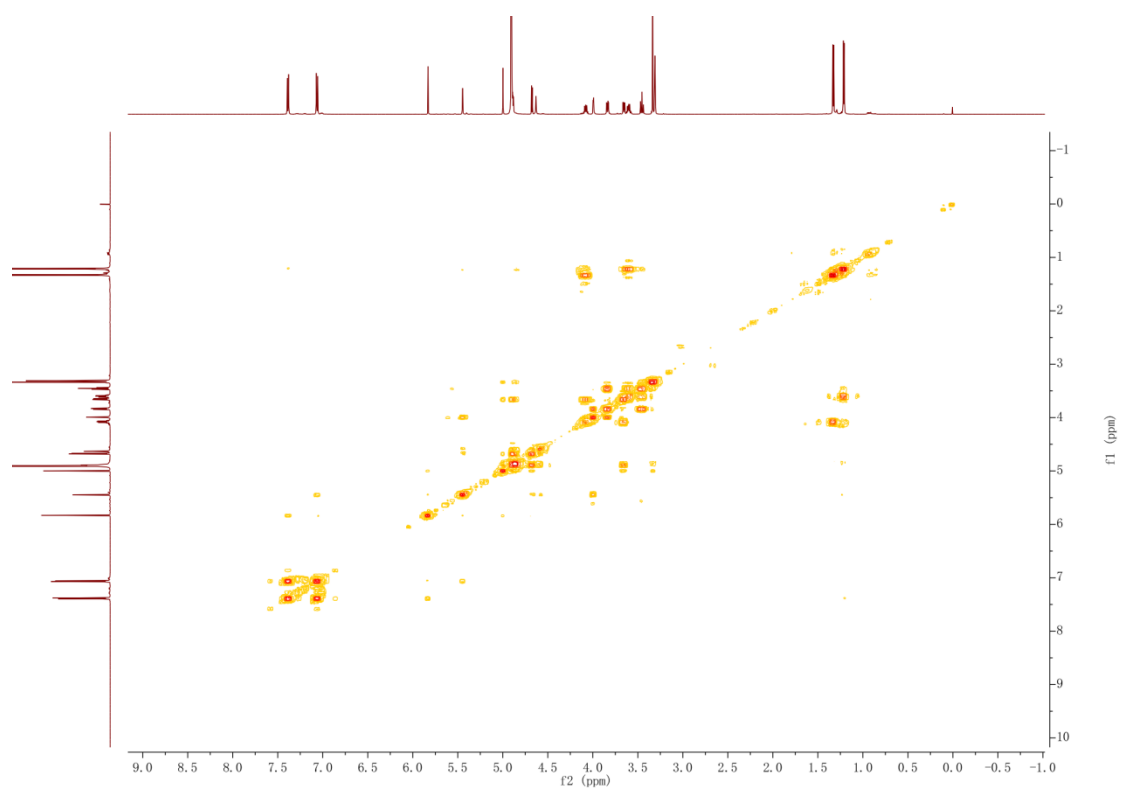

**Figure S25.**  $^1\text{H}$ - $^1\text{H}$  COSY spectrum of compound **3**.

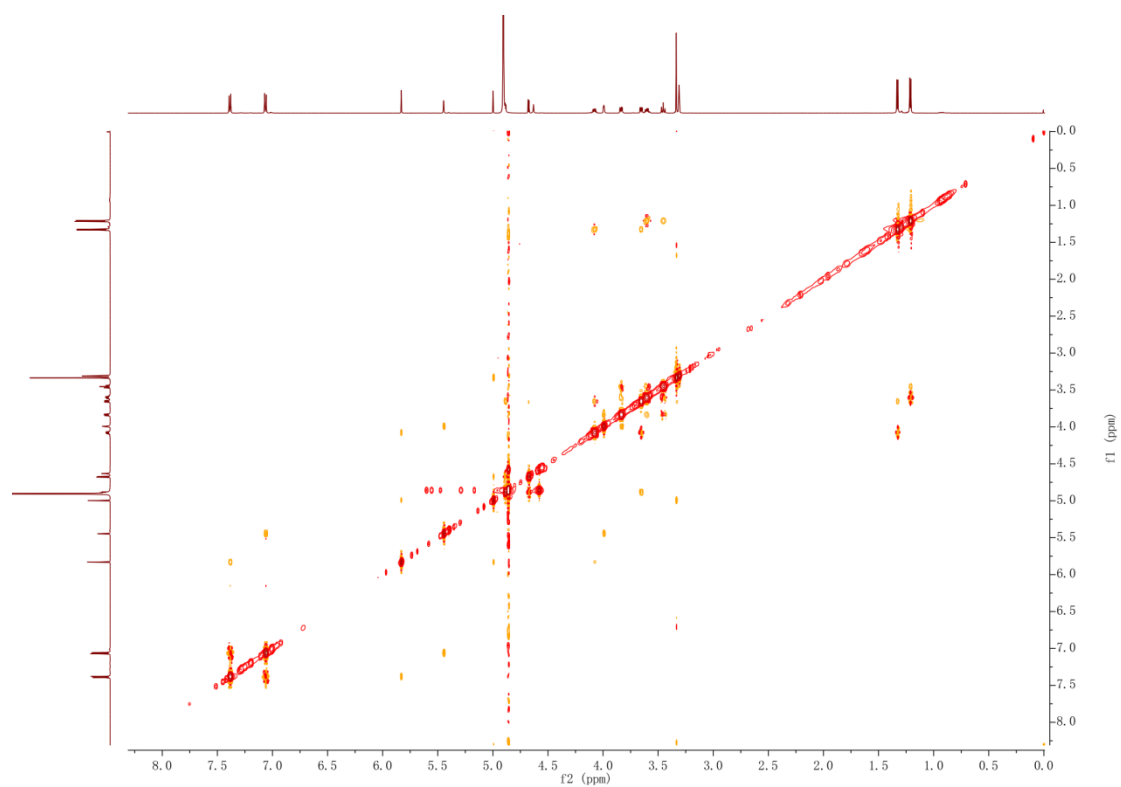

**Figure S26.** NOESY spectrum of compound **3**.



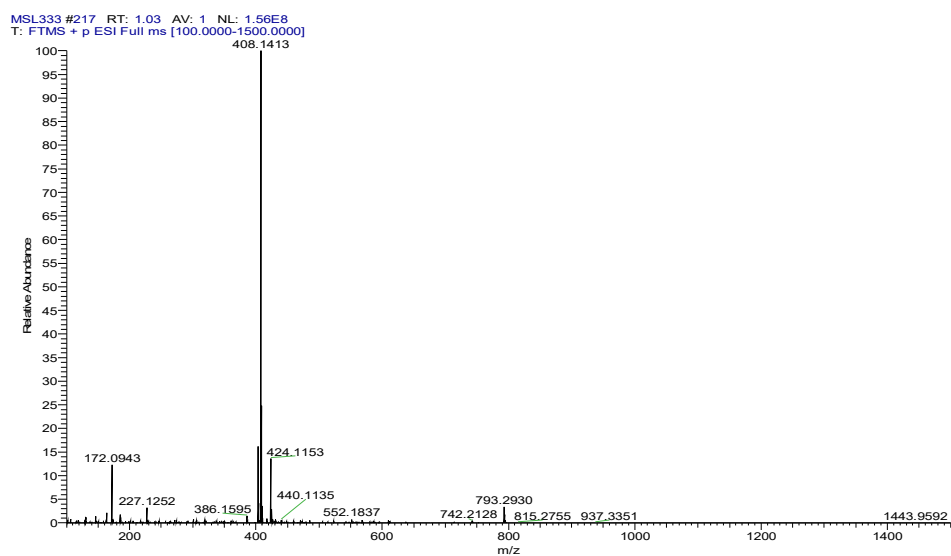

Figure S27. HR-ESI-MS spectrum of compound **4** (positive mode).

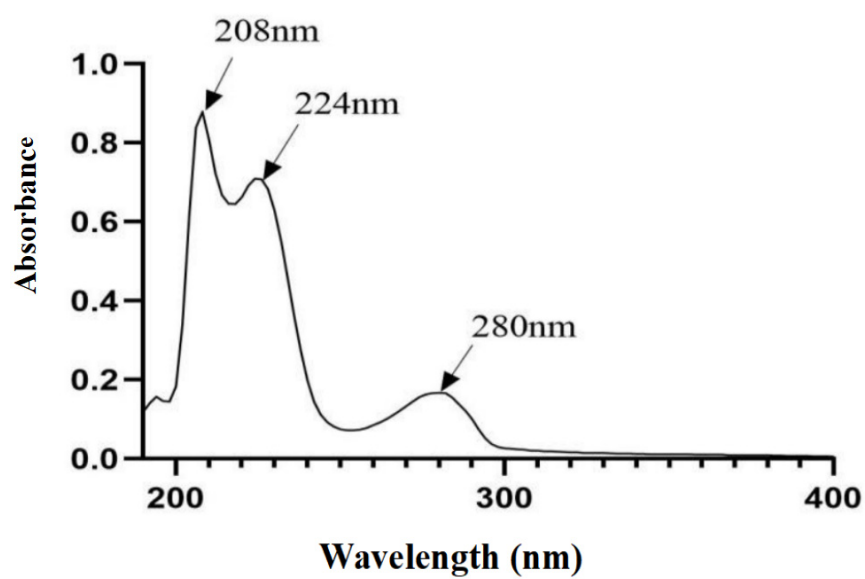

Figure S28. UV spectrum of compound **4**.

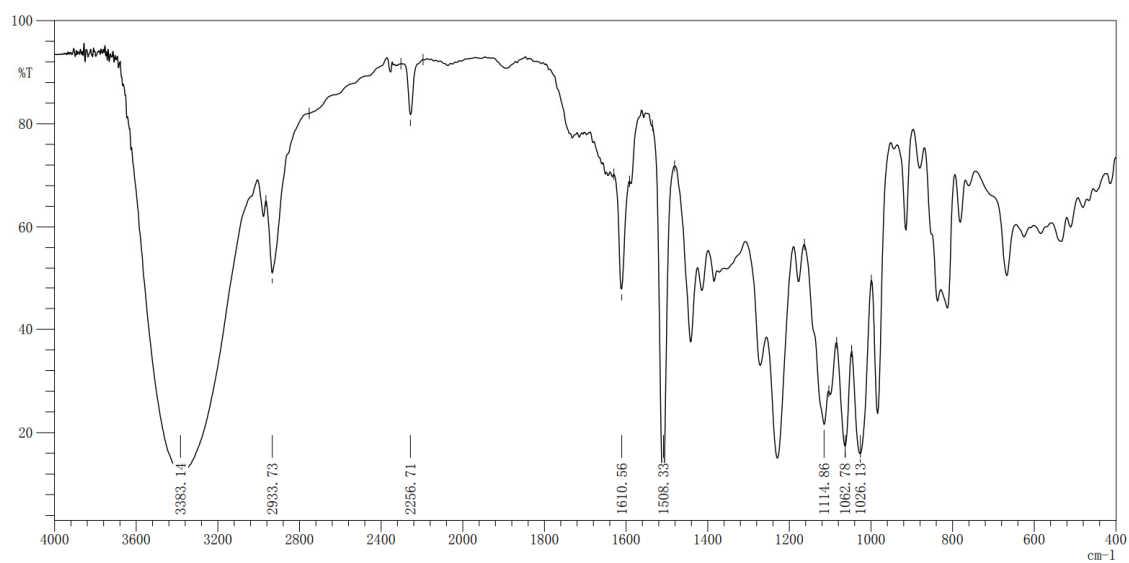

**Figure S29.** IR spectrum of compound **4**.

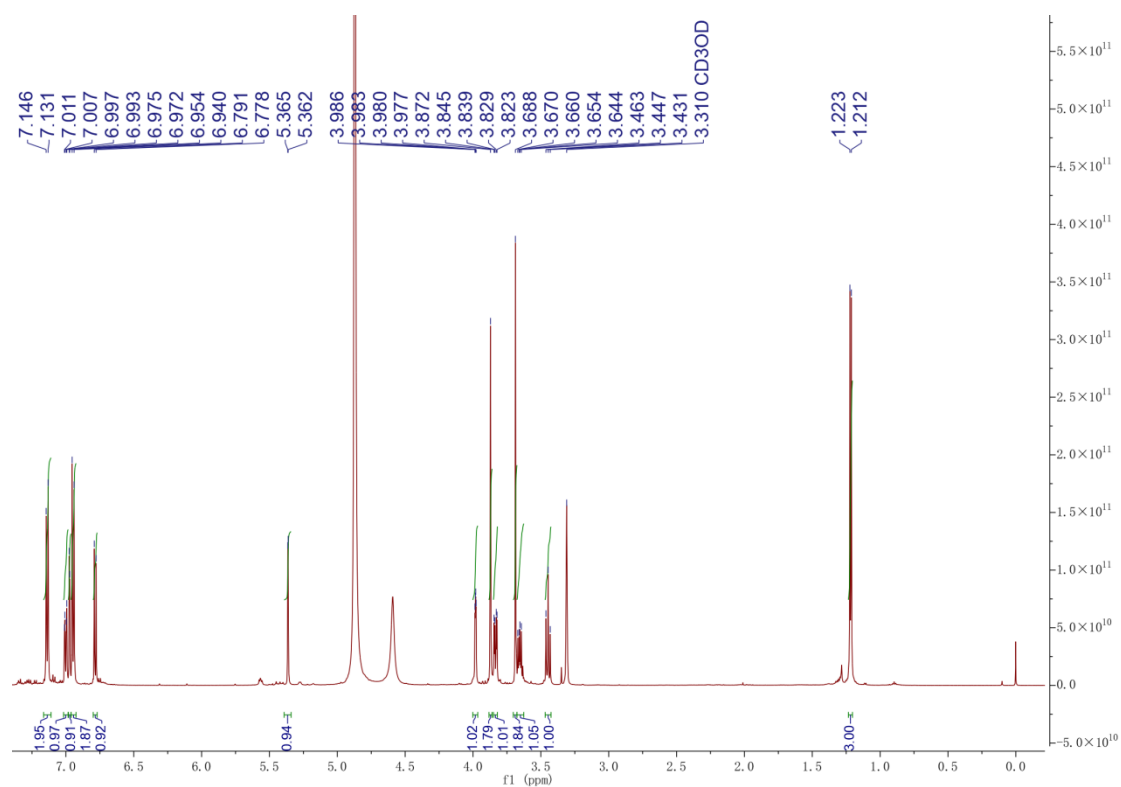

**Figure S30.**  $^1\text{H}$ -NMR (600MHz,  $\text{CD}_3\text{OD}$ ) spectrum of compound **4**.

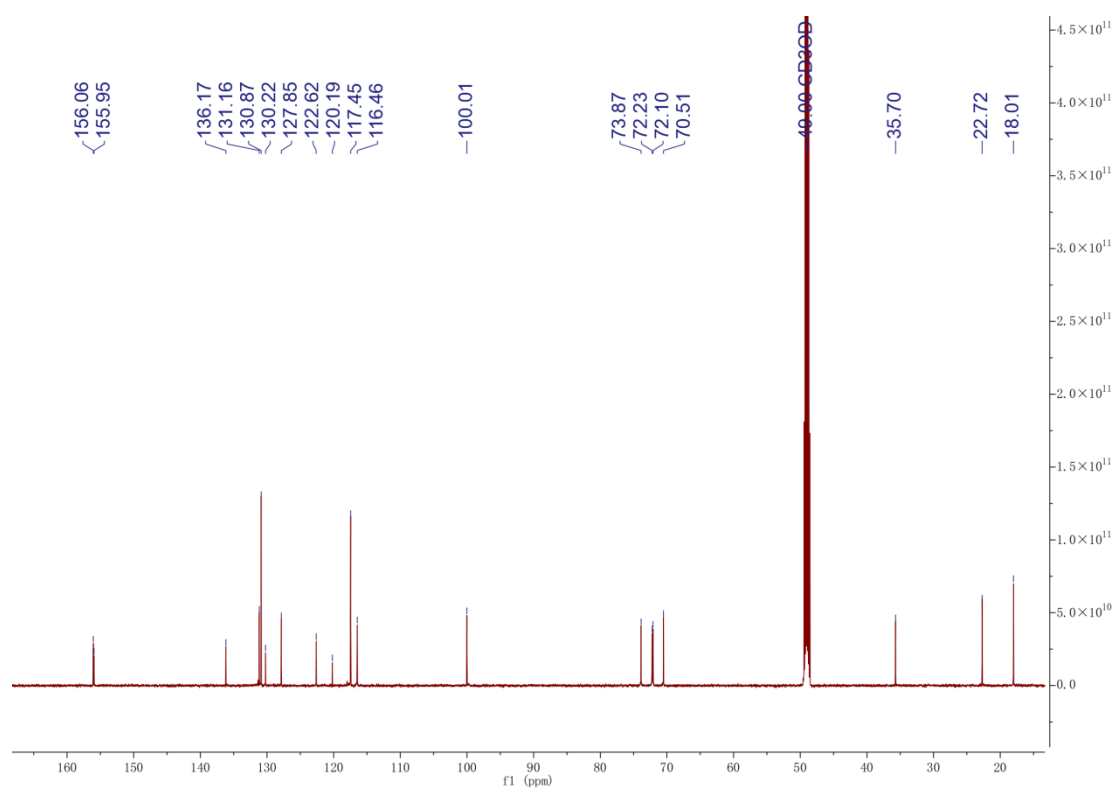

**Figure S31.** <sup>13</sup>C-NMR (150MHz, CD<sub>3</sub>OD) spectrum of compound 4.

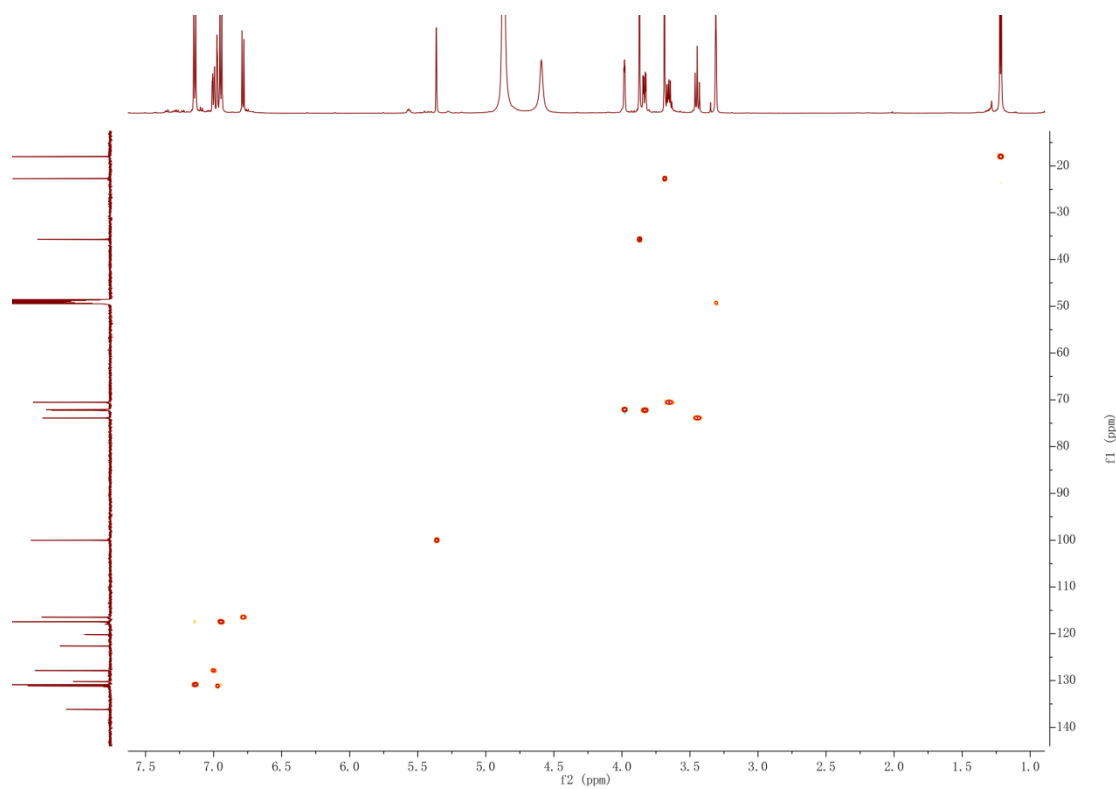

**Figure S32.** HMQC spectrum of compound 4.

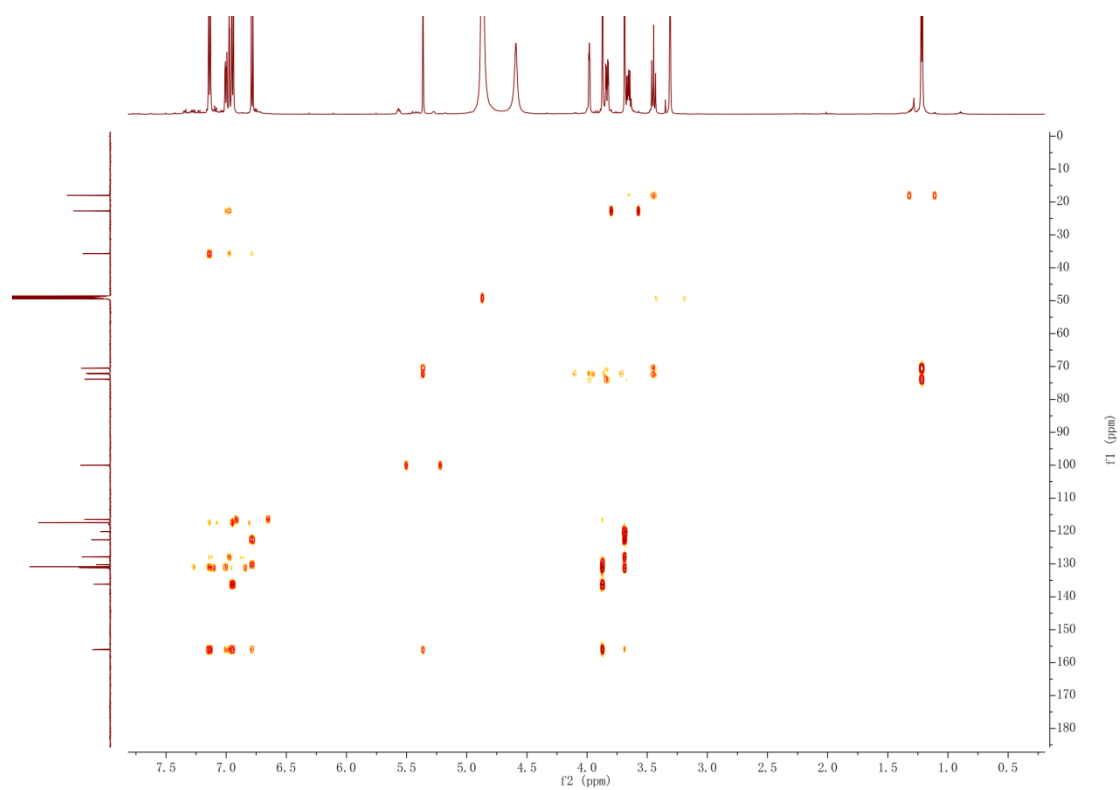

**Figure S33.** HMBC spectrum of compound 4.

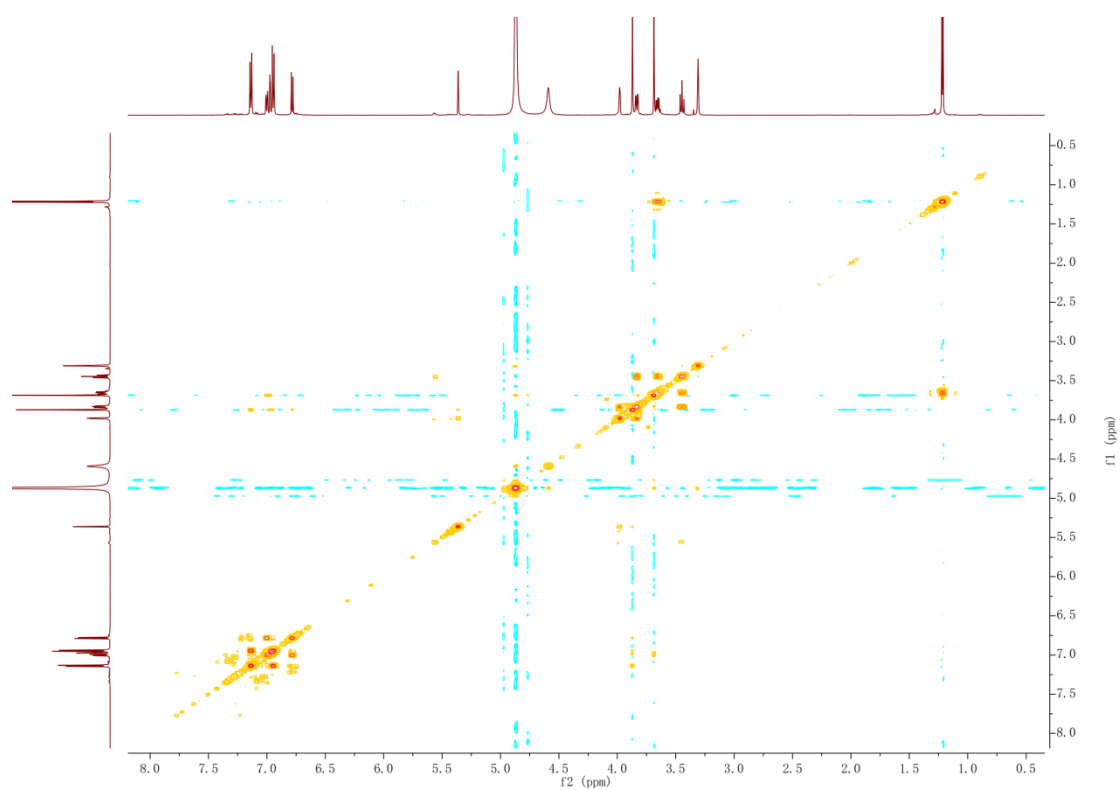

**Figure S34.**  $^1\text{H}$ - $^1\text{H}$  COSY spectrum of compound 4.

MSL-351 #328 RT: 0.85 AV: 1 NL: 6.93E7  
T: FTMS -p ESI Full ms [100.0000-1500.0000]

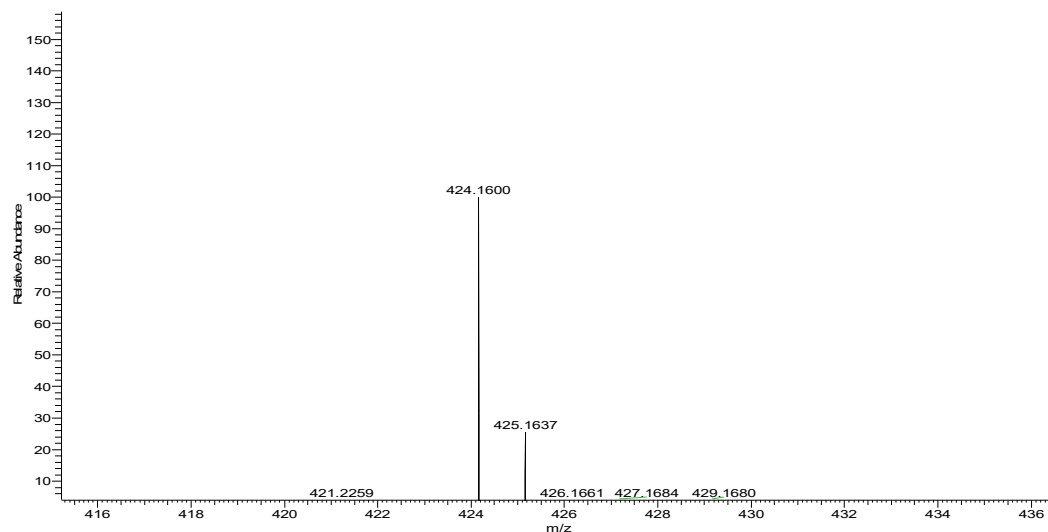

Figure S35. HR-ESI-MS spectrum of compound **5** (negative mode).

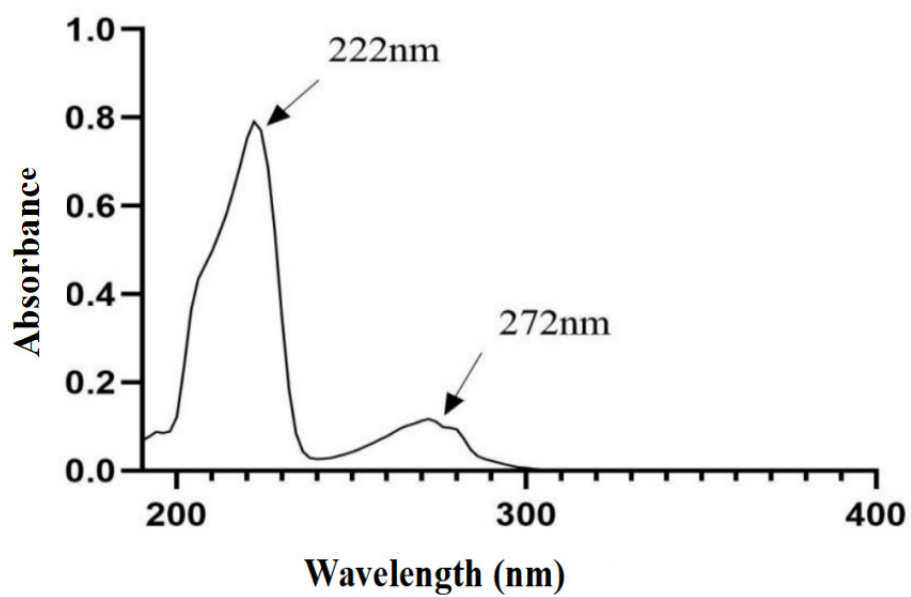

Figure S36. UV spectrum of compound **5**.

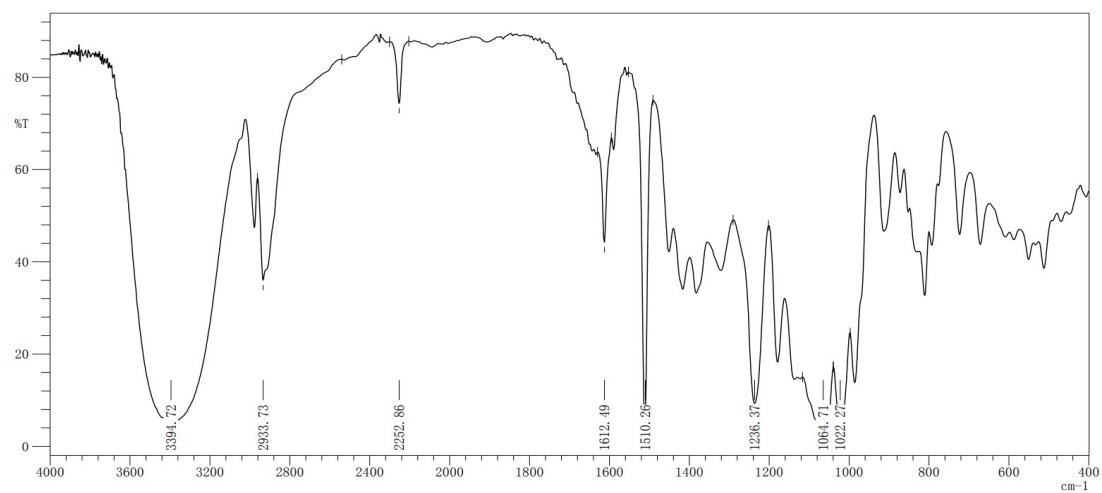

**Figure S37.** IR spectrum of compound **5**.

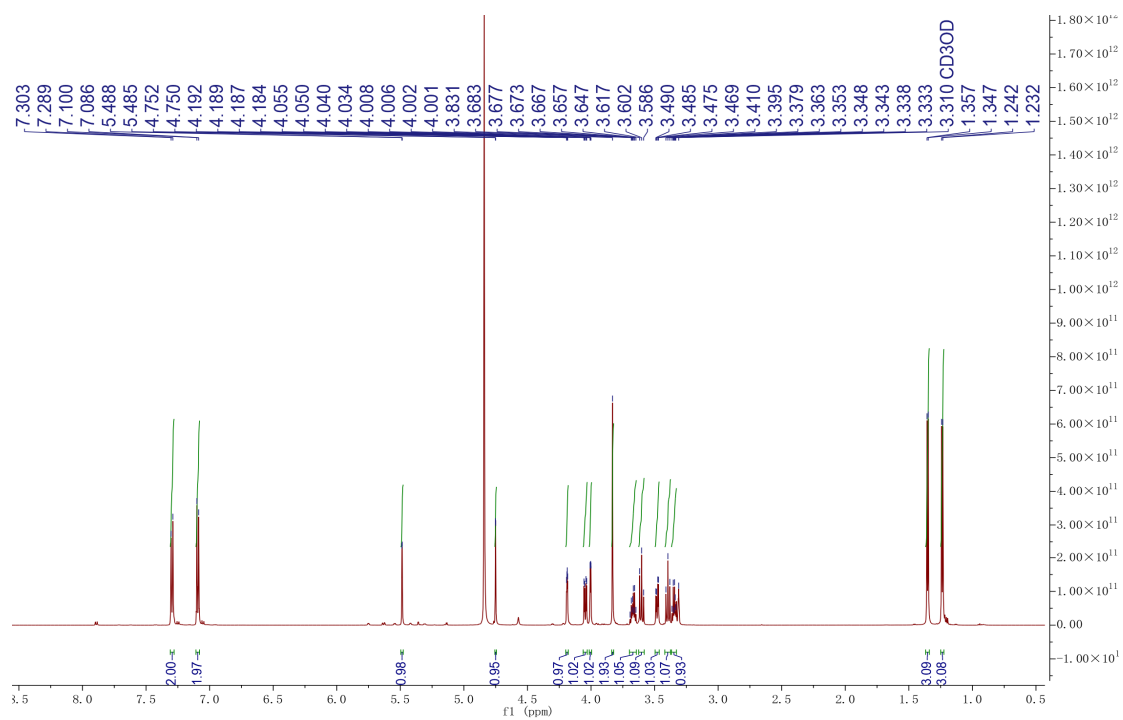

**Figure S38.** <sup>1</sup>H-NMR (600MHz, CD<sub>3</sub>OD) spectrum of compound **5**.

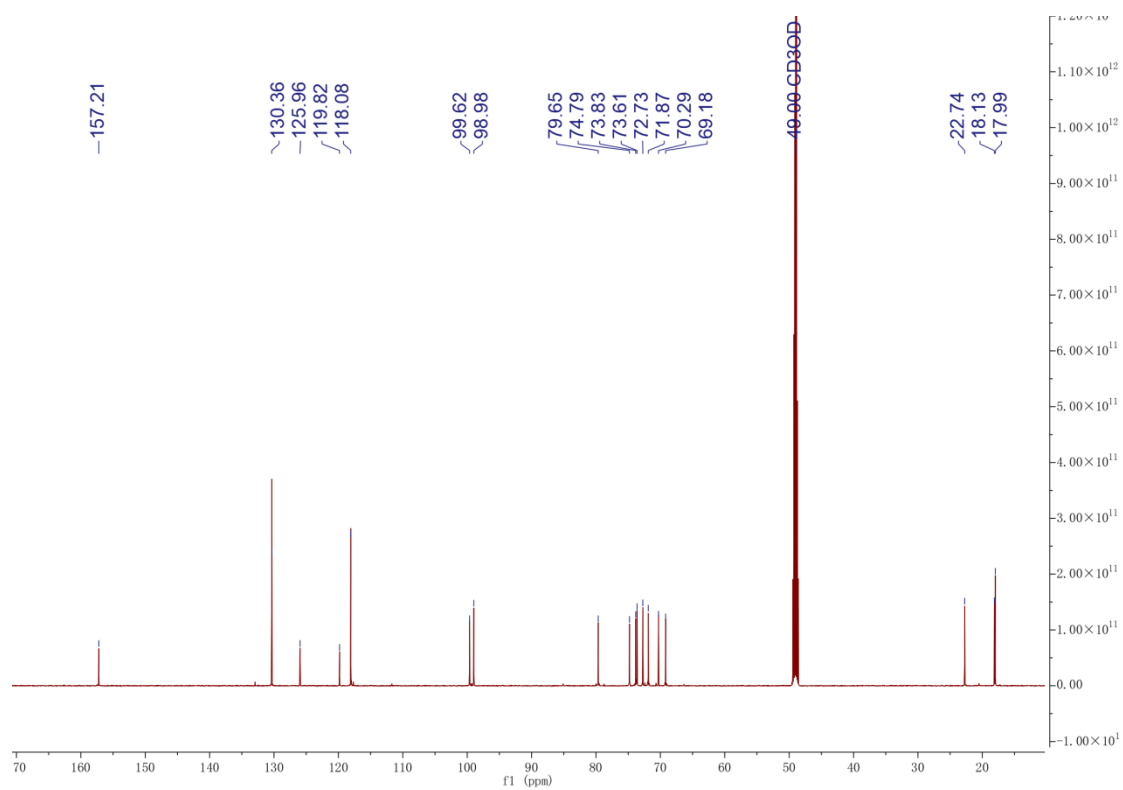

**Figure S39.** <sup>13</sup>C-NMR (150MHz, CD<sub>3</sub>OD) spectrum of compound **5**.

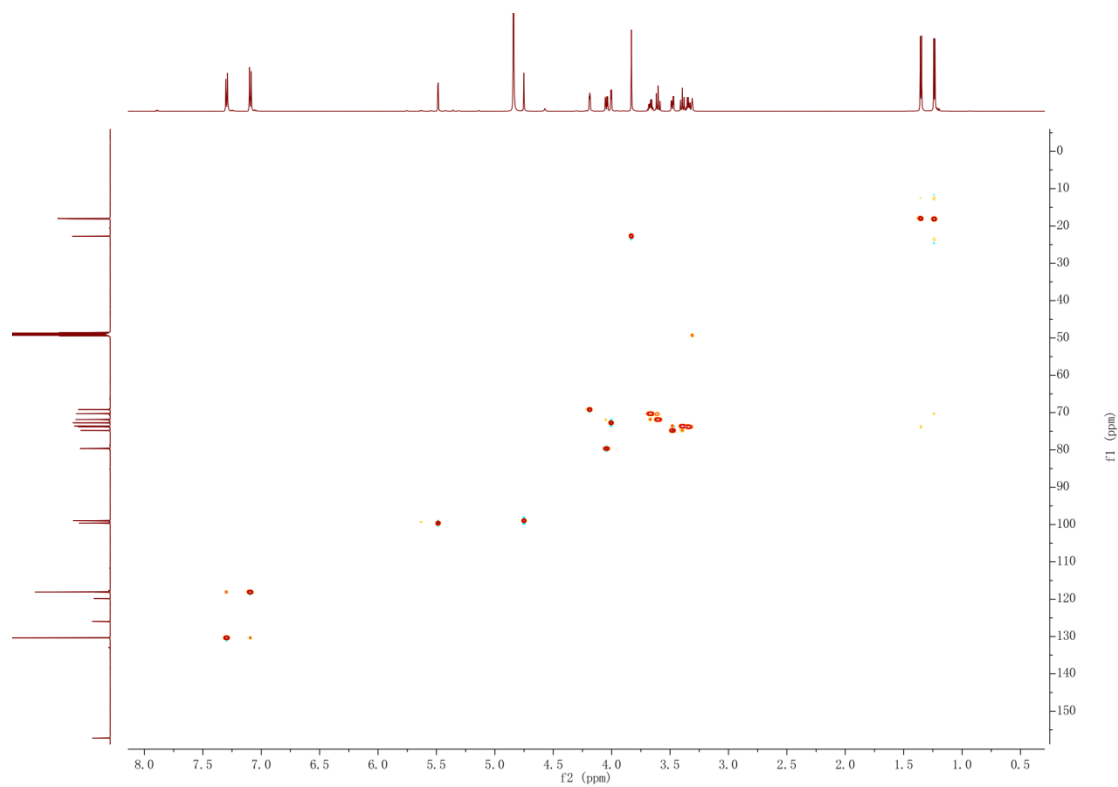

**Figure S40.** HMQC spectrum of compound **5**.

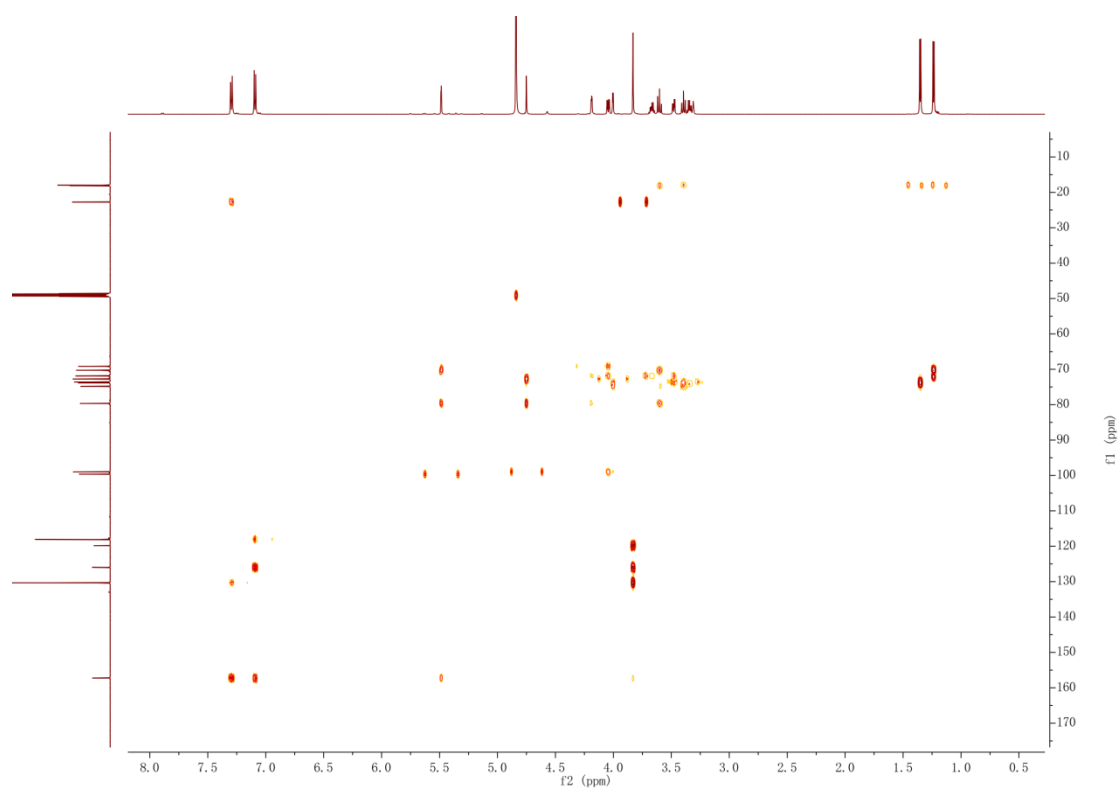

**Figure S41.** HMBC spectrum of compound **5**.

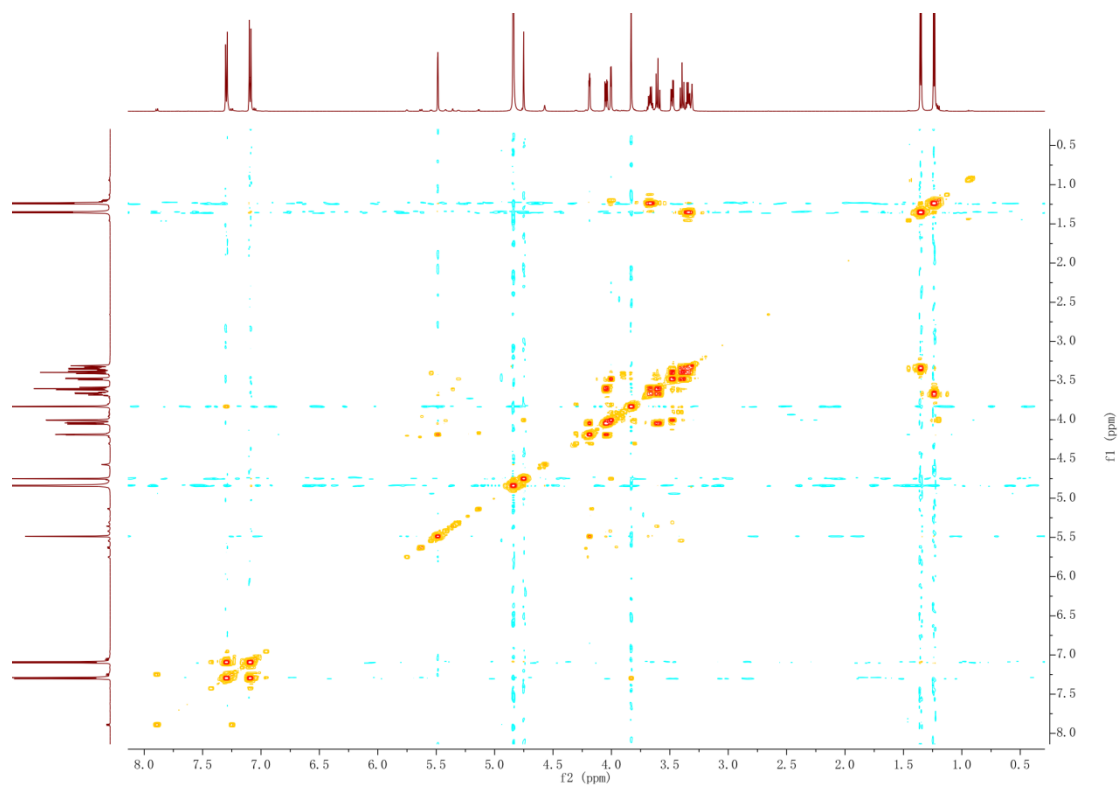

**Figure S42.**  $^1\text{H}$ - $^1\text{H}$  COSY spectrum of compound **5**.



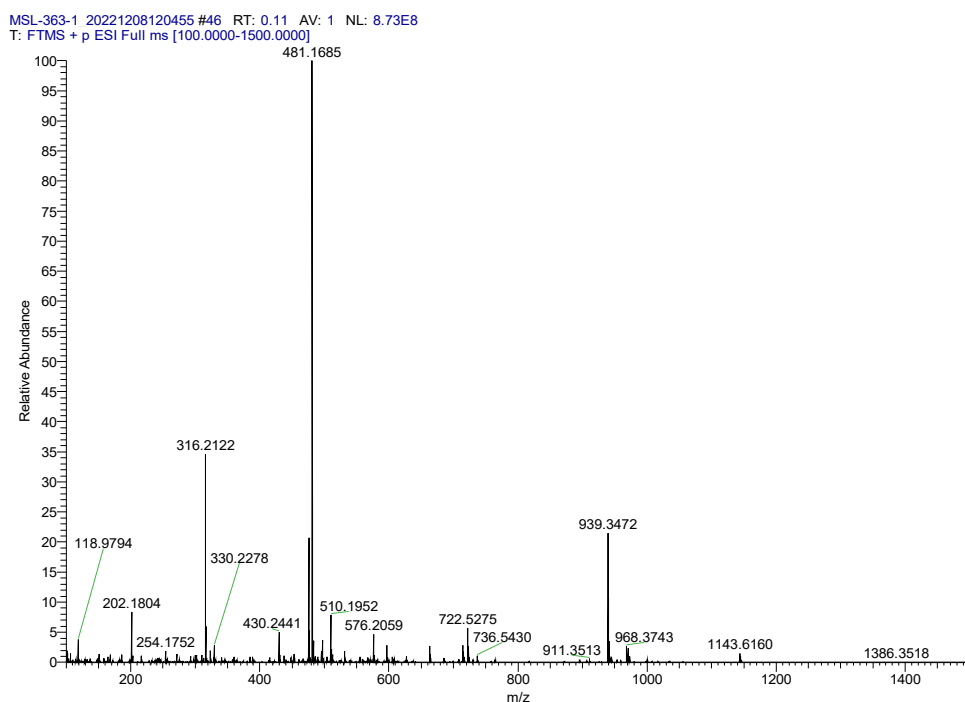

**Figure S43.** HR-ESI-MS spectrum of compound **6** (positive mode).

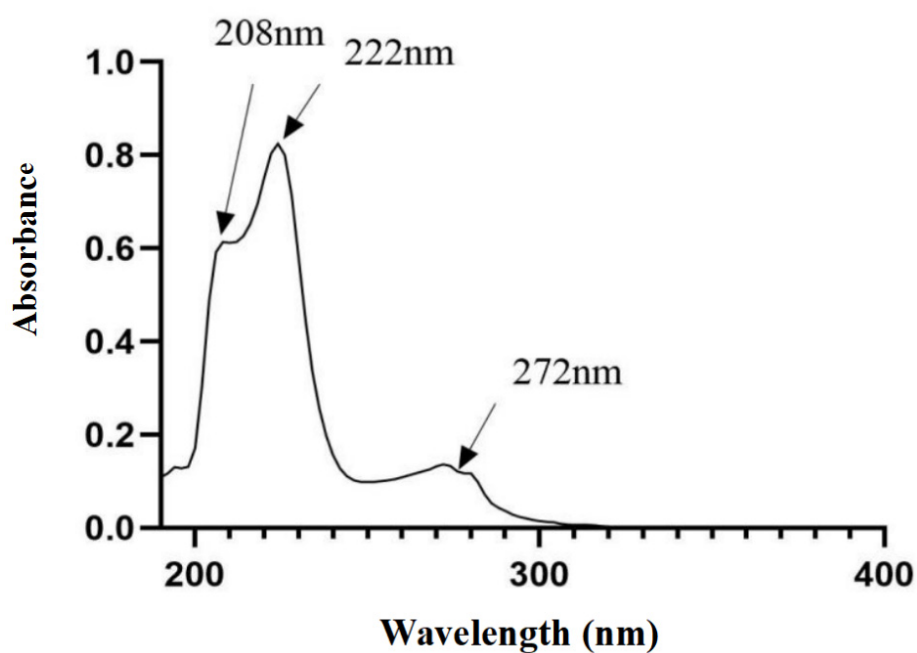

**Figure S44.** UV spectrum of compound **6**.

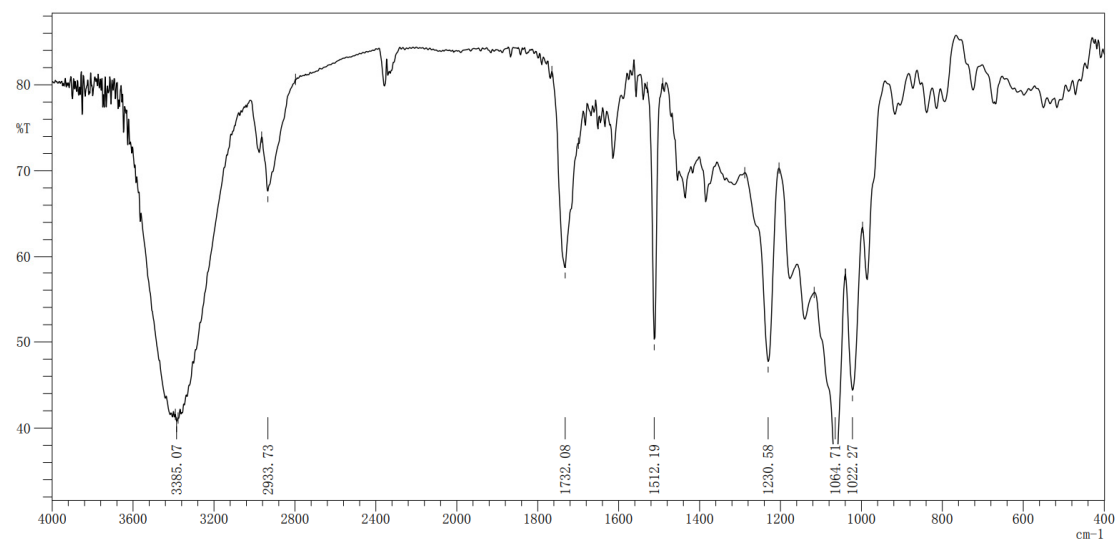

**Figure S45.** IR spectrum of compound **6**.

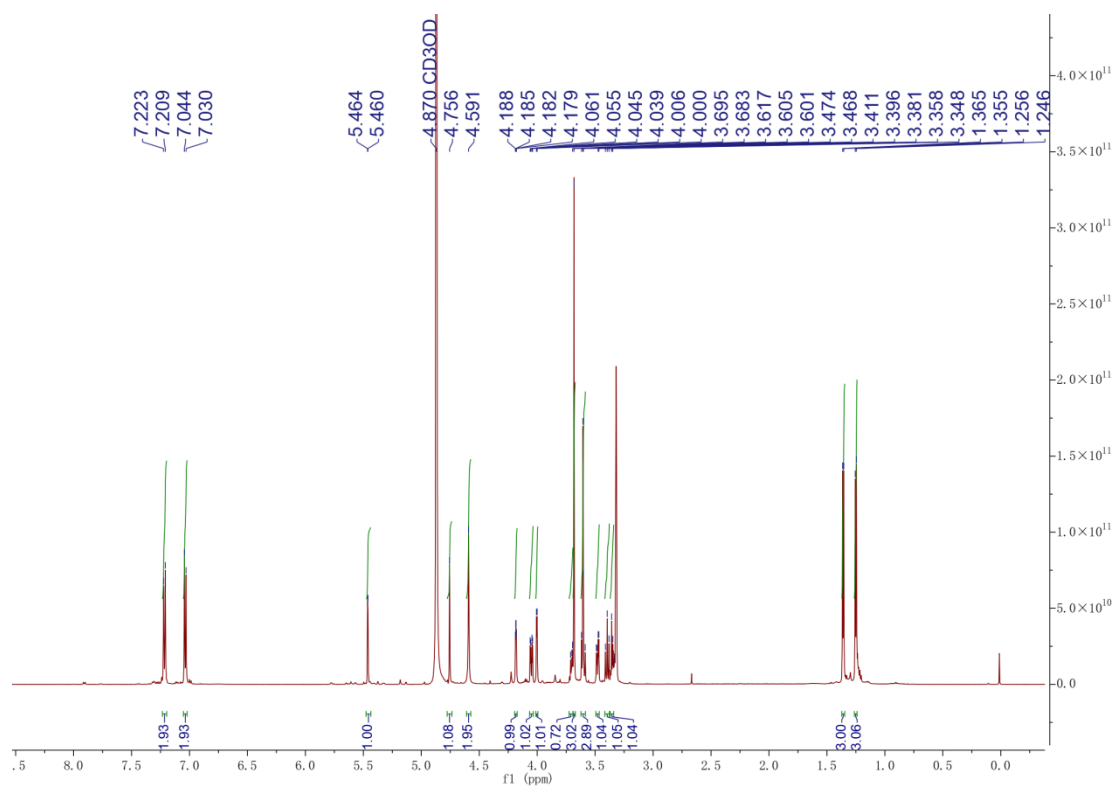

**Figure S46.** <sup>1</sup>H-NMR (600MHz, CD<sub>3</sub>OD) spectrum of compound **6**.

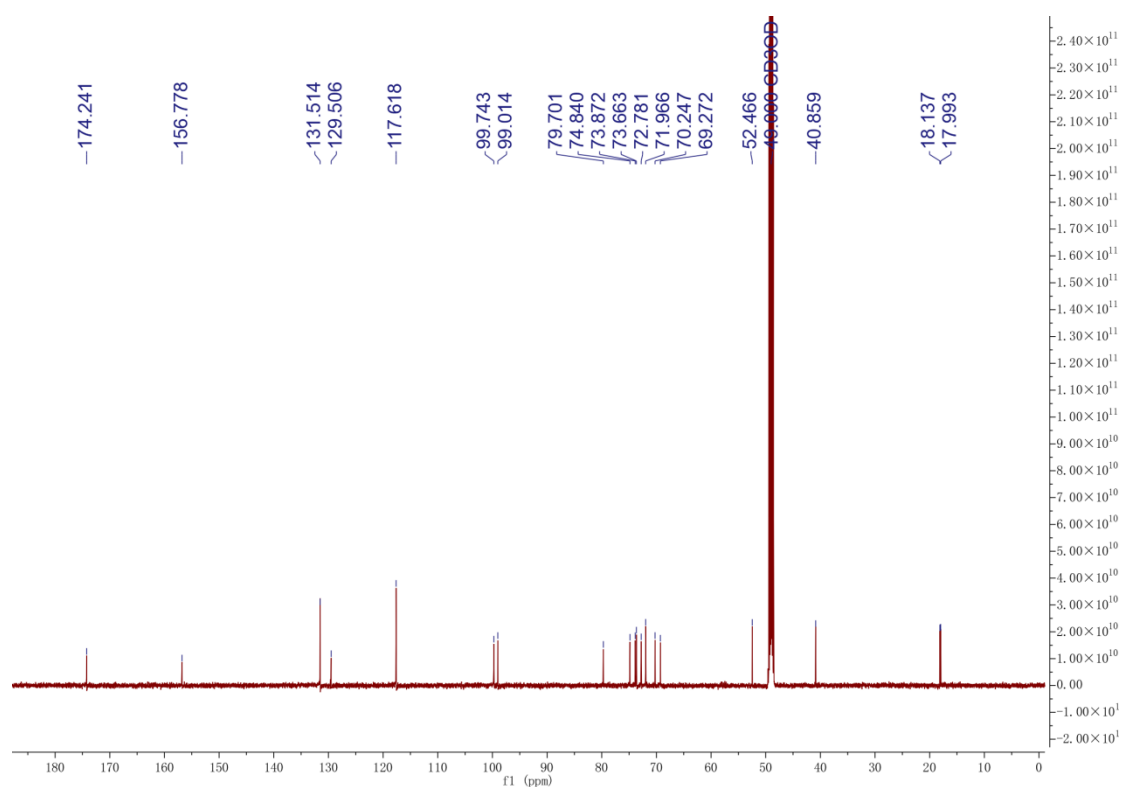

**Figure S47.**  $^{13}\text{C}$ -NMR (150MHz,  $\text{CD}_3\text{OD}$ ) spectrum of compound **6**.

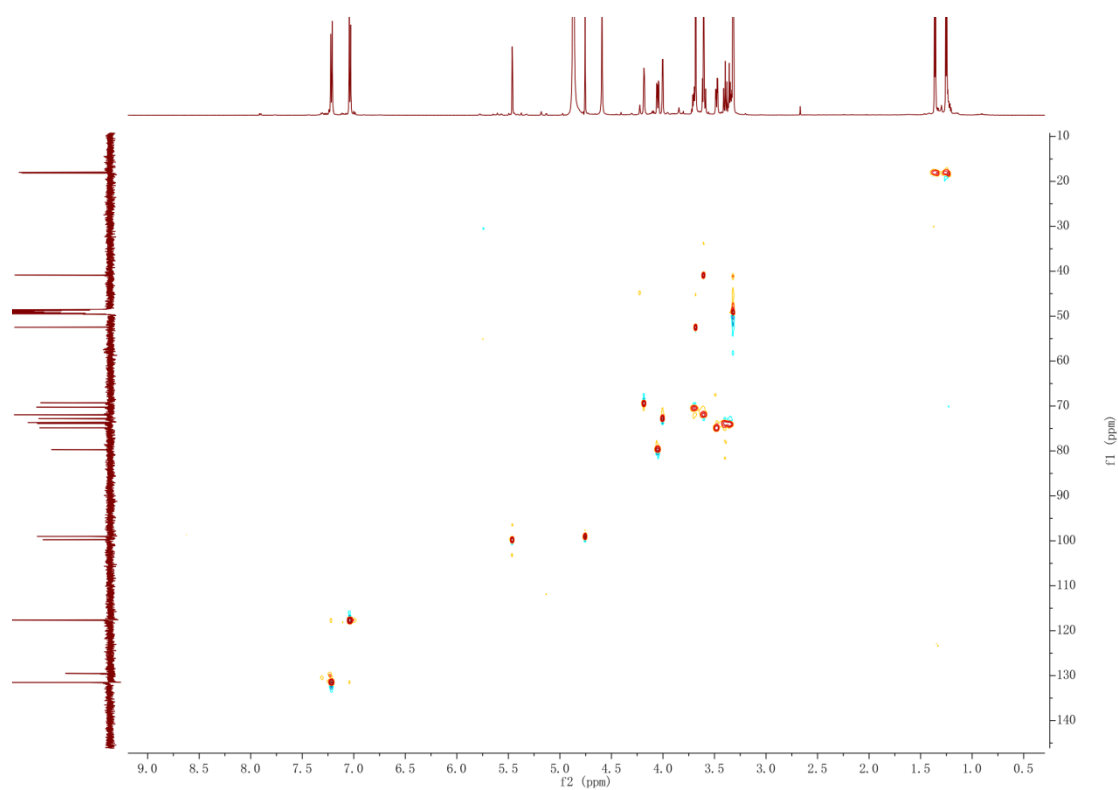

**Figure S48.** HMQC spectrum of compound **6**.

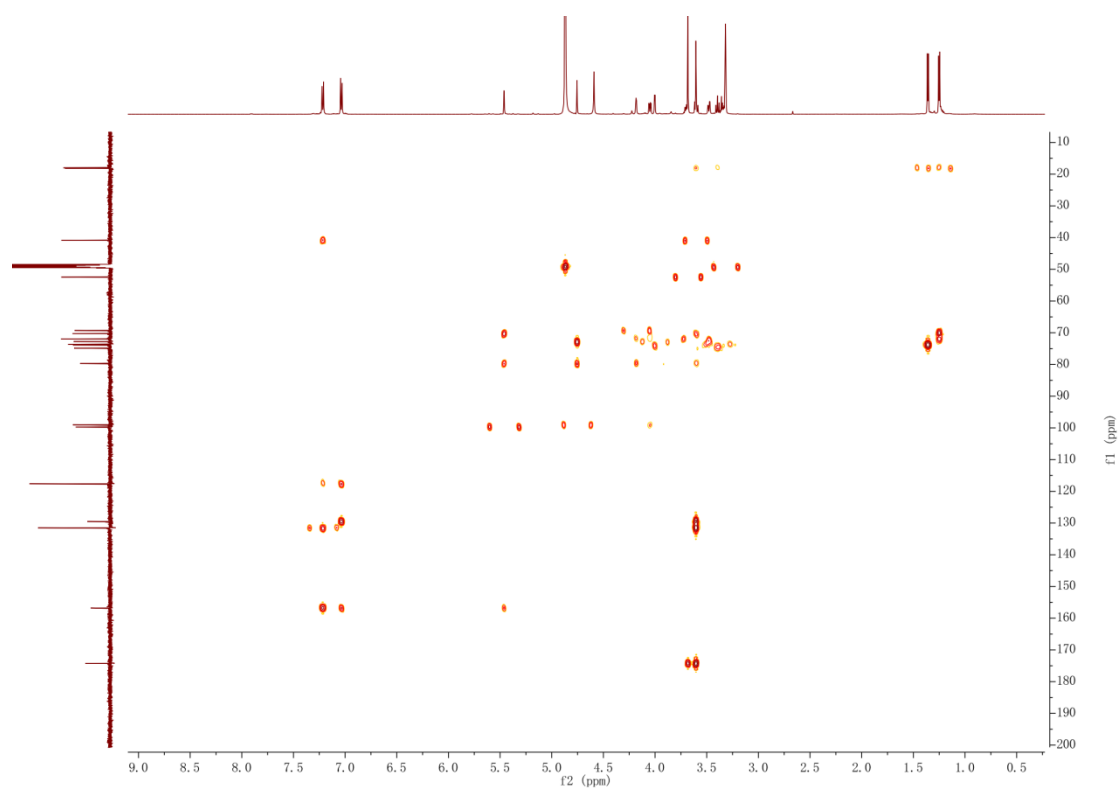

**Figure S49.** HMBC spectrum of compound **6**.

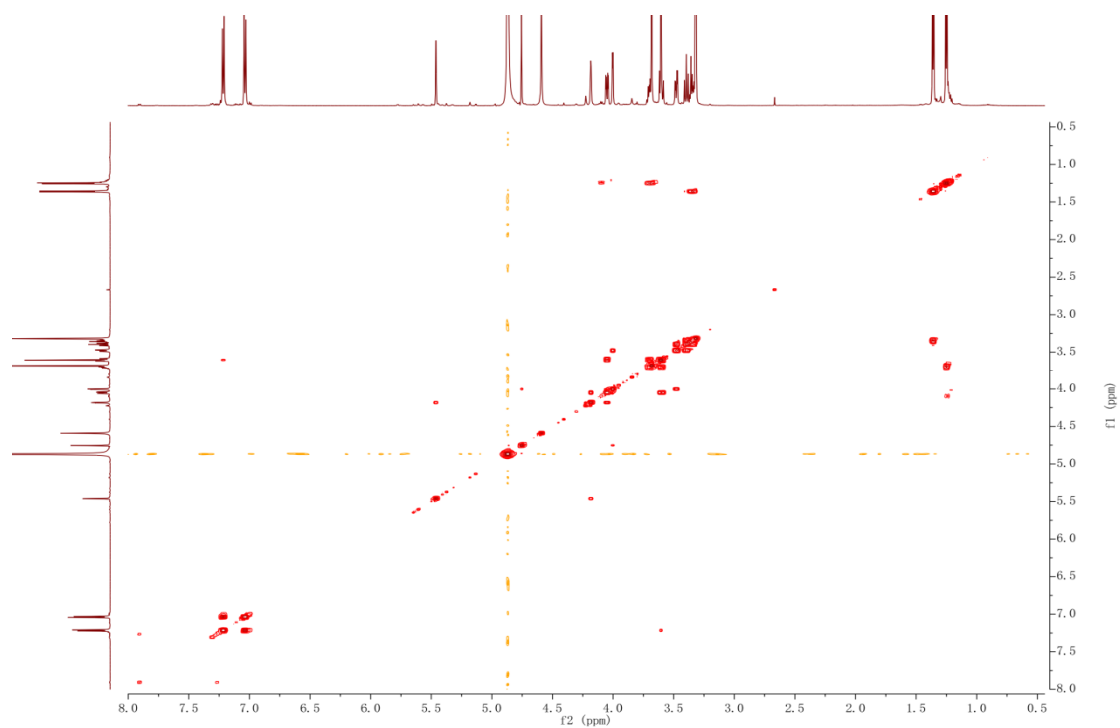

**Figure S50.**  $^1\text{H}$ - $^1\text{H}$  COSY spectrum of compound **6**.

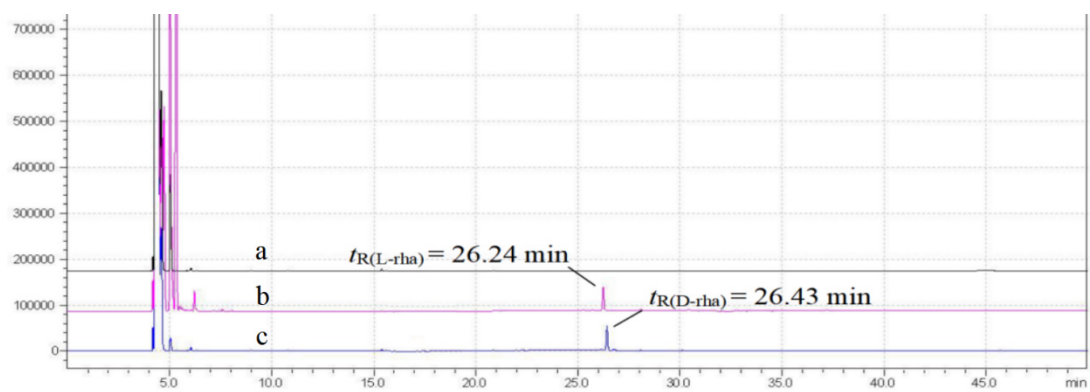

D-rhamnose and L-rhamnose (contrast with compound **1-3**)  
(a: blank; b: L-rhamnose; c: D-rhamnose)

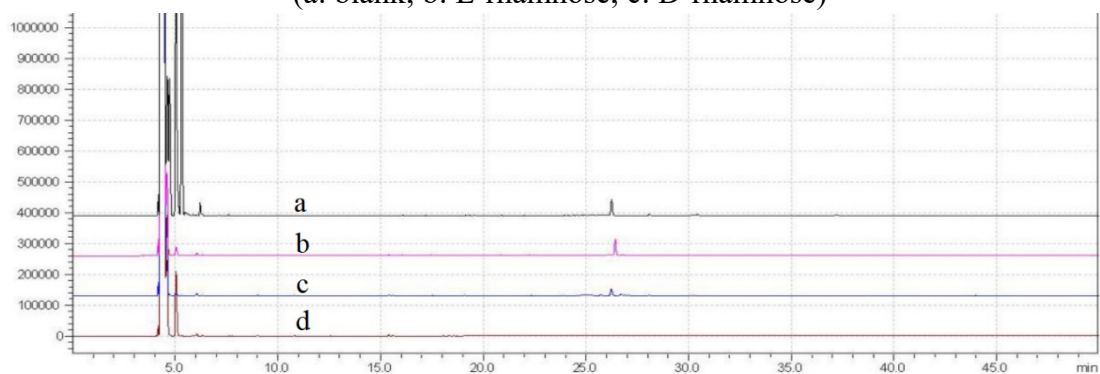

compound **1**  
(a: L-rhamnose; b: D-rhamnose; c: compound **1**; d: blank)

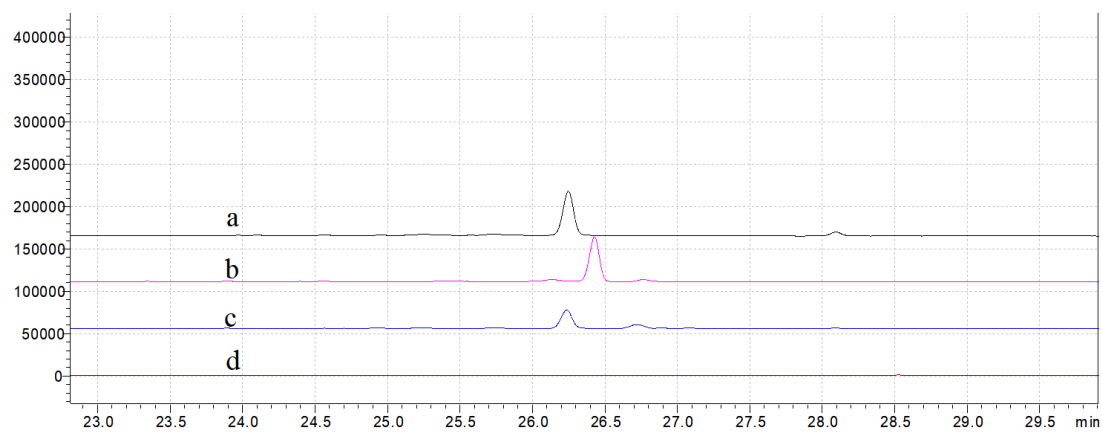

Extended compound **1**  
(a: L-rhamnose; b: D-rhamnose; c: compound **1**; d: blank)

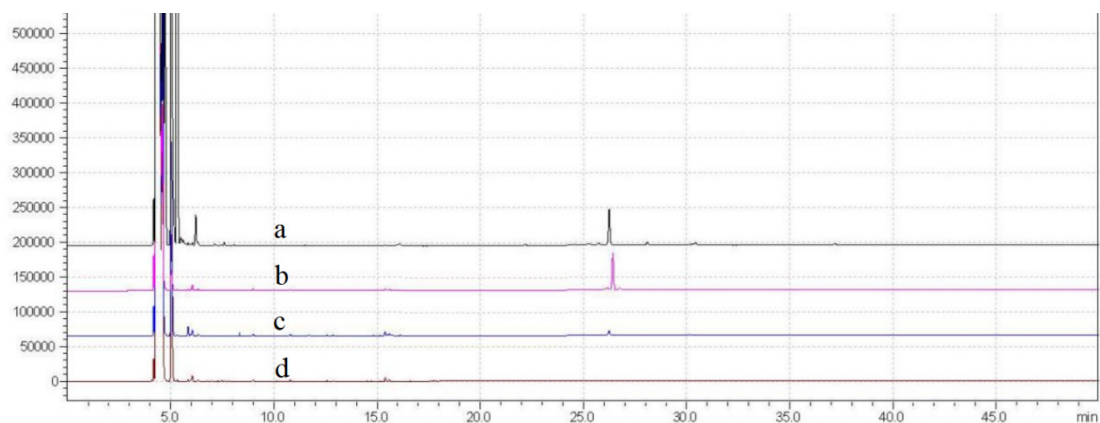

compound 2

(a: L-rhamnose; b: D-rhamnose; c: compound 2; d: blank)

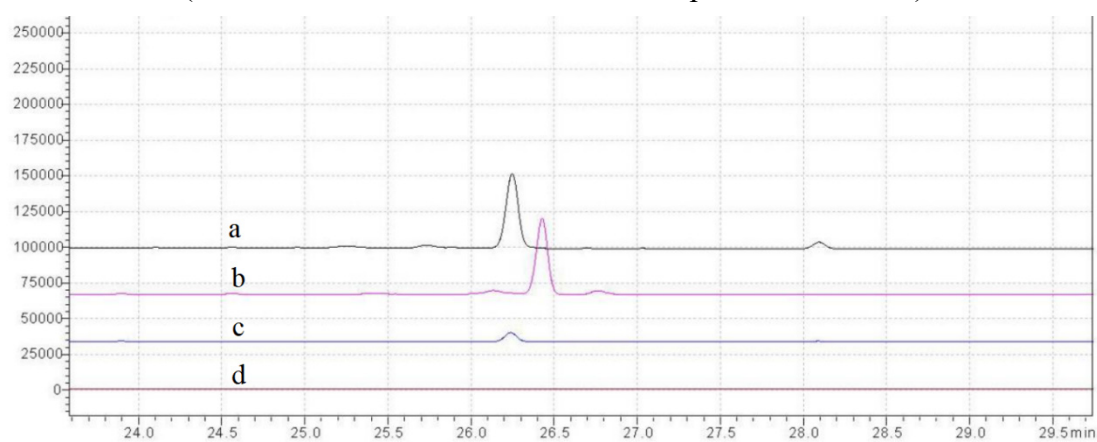

Extended compound 2

(a: L-rhamnose; b: D-rhamnose; c: compound 2; d: blank)

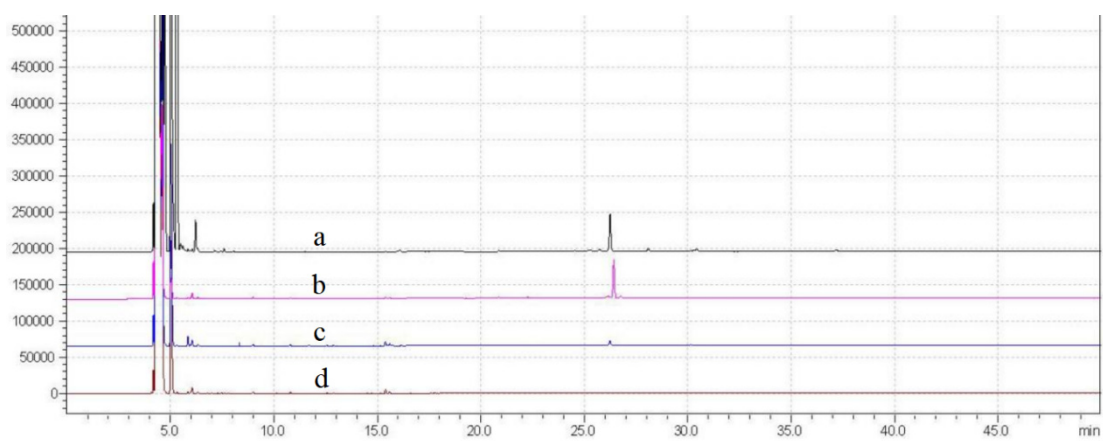

compound 3

(a: L-rhamnose; b: D-rhamnose; c: compound 3; d: blank)

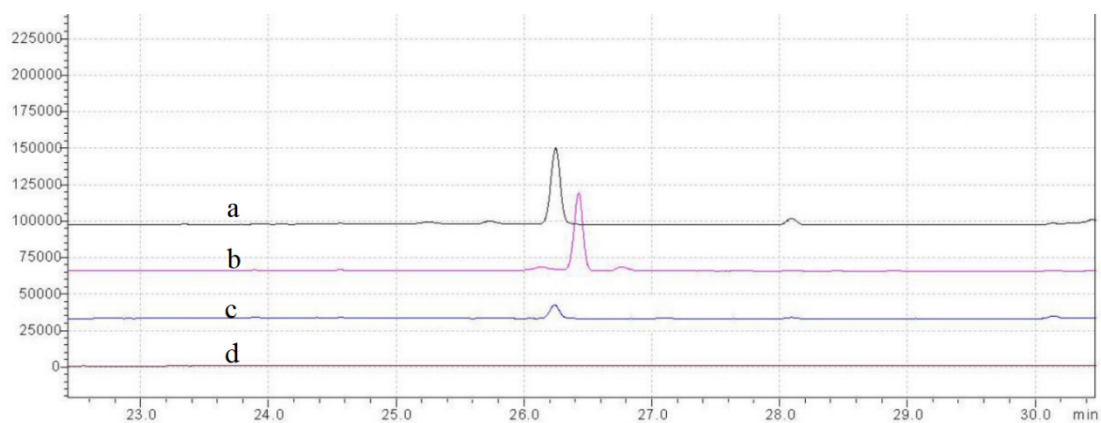

### Extended compound 3

(a: L-rhamnose; b: D-rhamnose; c: compound 3; d: blank)

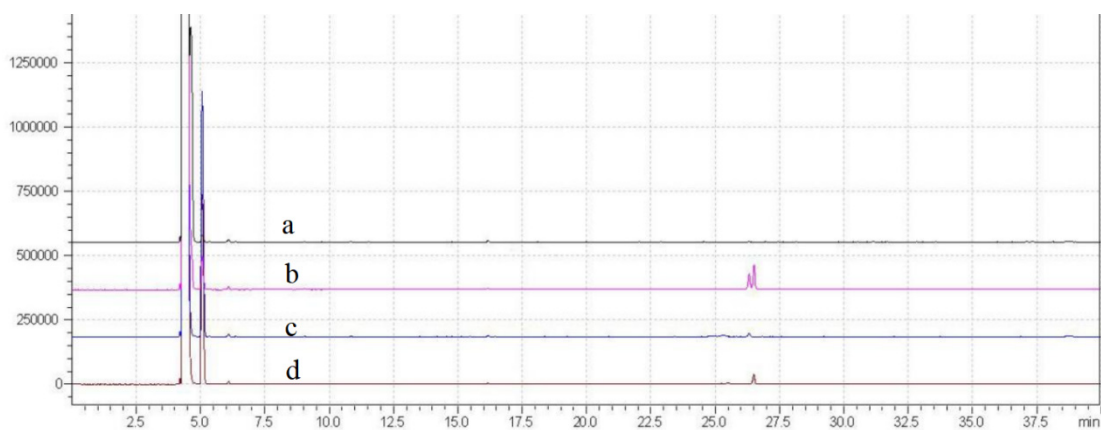

### D-rhamnose and L-rhamnose (contrast with compound 4-6)

(a: blank; b: D-L-rhamnose; c: L-rhamnose; d: D-rhamnose)

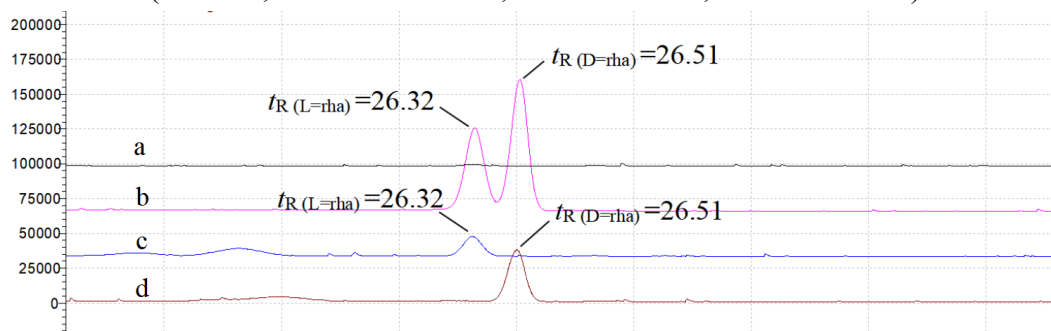

### Extended D-rhamnose and L-rhamnose (contrast with compound 4-6)

(a: blank; b: D-L-rhamnose; c: L-rhamnose; d: D-rhamnose)

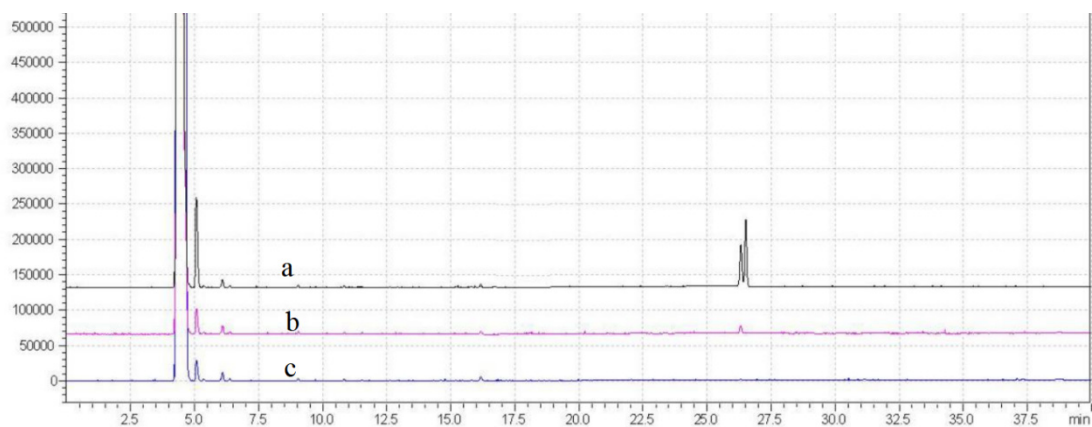

**compound 4**

(a: D-L-rhamnose; b: compound 4; c: blank)

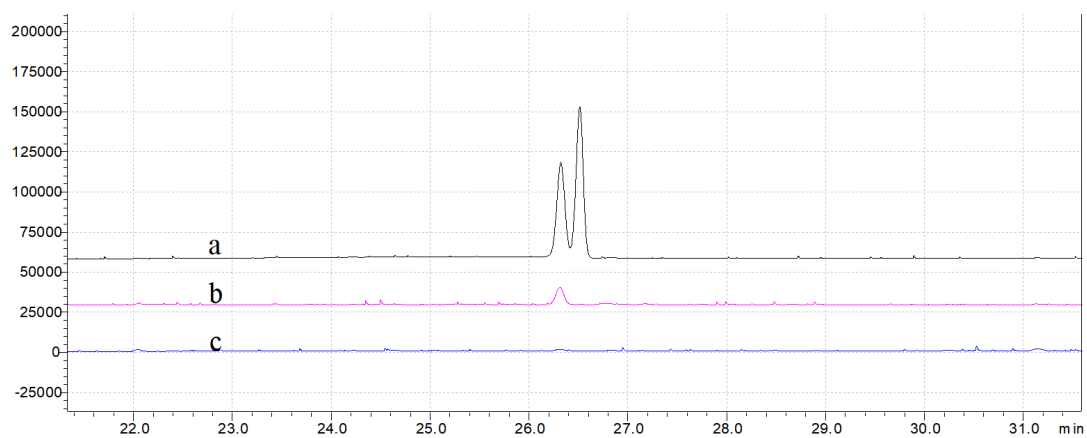

**Extended compound 4**

(a: D-L-rhamnose; b: compound 4; c: blank)

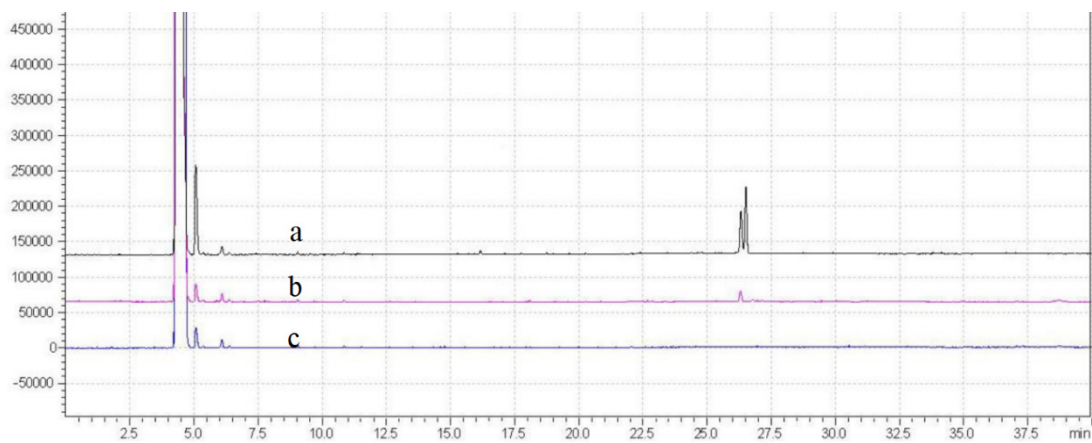

**compound 5**

(a: D-L-rhamnose; b: compound 5; c: blank)



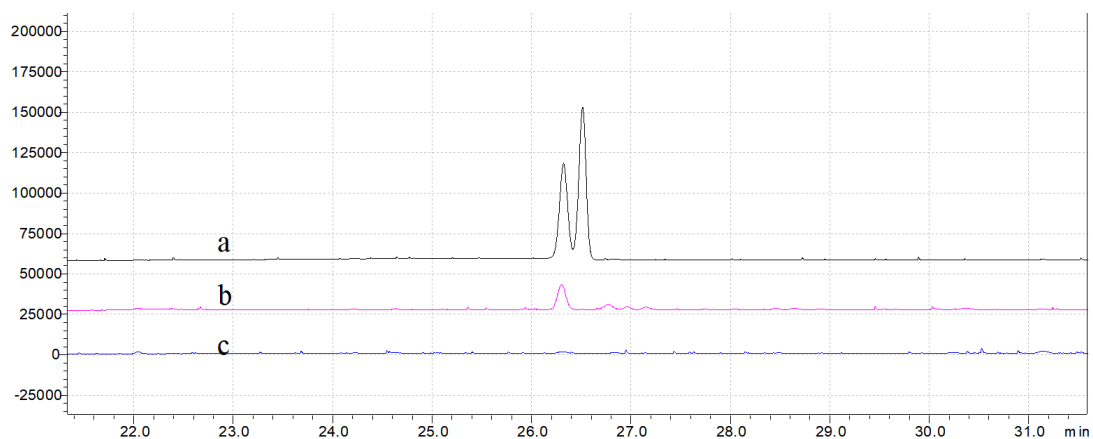

Extended compound 5  
(a: D-L-rhamnose; b: compound 5; c: blank)

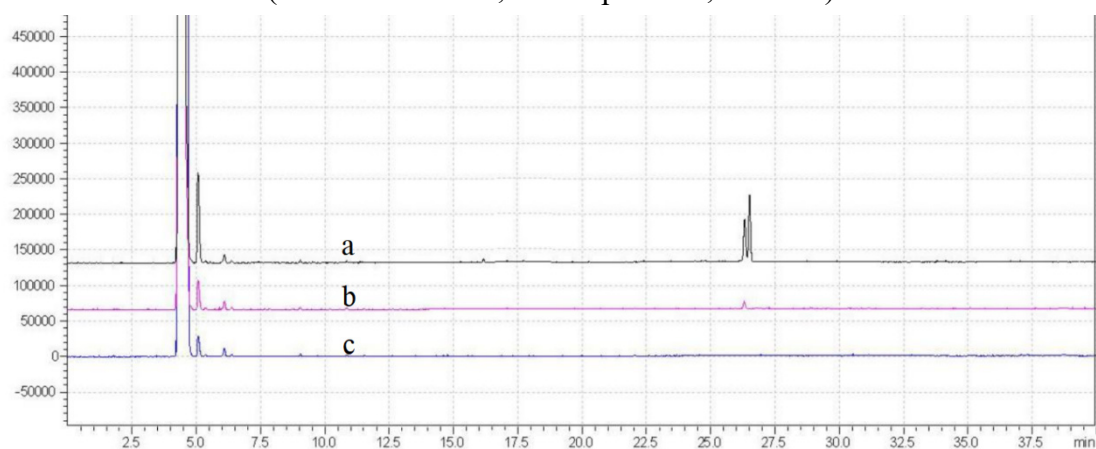

compound 6  
(a: D-L-rhamnose; b: compound 6; c: blank)

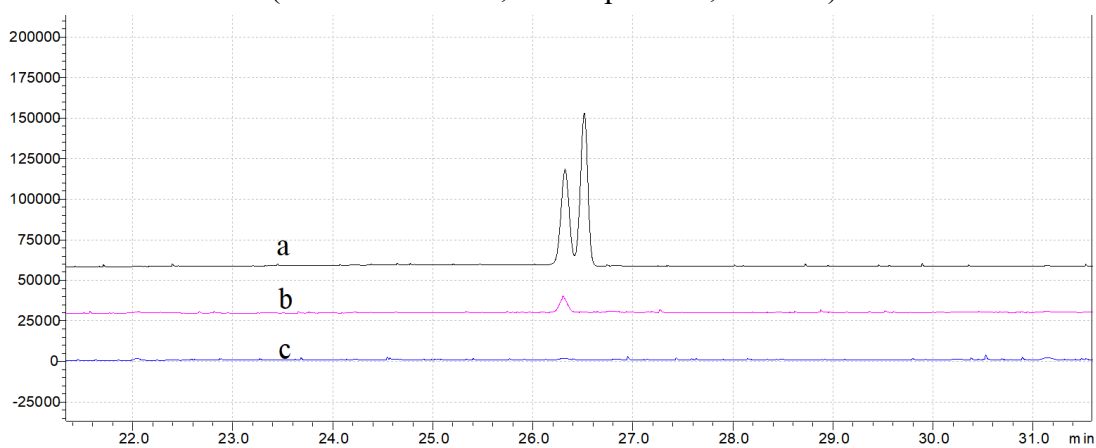

Extended compound 6  
(a: D-L-rhamnose; b: compound 6; c: blank)

**Figure S51.** GC analysis of D-rhamnose, L-rhamnose and compounds 1–6.
